# Cross-scale dynamics and the evolutionary emergence of infectious diseases

Sebastian J. Schreiber<sup>1,\*</sup>, Ruian Ke<sup>2</sup>, Claude Loverdo<sup>3</sup>, Miran Park<sup>4</sup>, Prianna Ahsan<sup>4</sup>, James O. Lloyd-Smith<sup>4,5,\*\*</sup>

<sup>1</sup>Department of Evolution and Ecology, University of California, Davis, California, 95616, USA

<sup>2</sup>Department of Mathematics, North Carolina State University, Raleigh, NC 27695, USA

<sup>3</sup> Laboratoire Jean Perrin, Sorbonne Université, CNRS, 75005 Paris, France.

<sup>4</sup>Department of Ecology & Evolution, University of California, Los Angeles, California, 90095, USA

<sup>5</sup>Fogarty International Center, National Institutes of Health, Bethesda, Maryland, 20892, USA

Corresponding authors: \*[sschreiber@ucdavis.edu](mailto:sschreiber@ucdavis.edu), \*\*[jlloydsmith@ucla.edu](mailto:jlloydsmith@ucla.edu)

## ABSTRACT

When emerging pathogens encounter new host species for which they are poorly adapted, they must evolve to escape extinction. Pathogens experience selection on traits at multiple scales, including replication rates within host individuals and transmissibility between hosts. We analyze a stochastic model linking pathogen growth and competition within individuals to transmission between individuals. Our analysis reveals a new factor, the cross-scale reproductive number, that quantifies how quickly mutant strains increase in frequency when they initially appear in the infected host population. This cross-scale reproductive number combines with viral mutation rates, reproductive numbers, and transmission bottleneck width to determine the likelihood of evolutionary emergence, and whether evolution occurs swiftly or gradually within chains of transmission. We find that wider transmission bottlenecks facilitate emergence of pathogens with short-term infections, but hinder emergence of pathogens exhibiting cross-scale selective conflict and long-term infections. Our results provide a framework for a new generation of evidence-based risk assessment of emergence threats.

## INTRODUCTION

2 Emerging infectious diseases are rising in frequency and impact and are placing a growing  
burden on public health and world economies [Jones et al., 2008, Woolhouse et al., 2012b, Morse  
4 et al., 2012, Howard and Fletcher, 2012]. Nearly all of these emergence events involve pathogens  
that are exposed to novel environments such as zoonotic pathogens entering human populations  
6 from non-human animal reservoirs, or human pathogens exposed to antimicrobial drugs [Jones  
et al., 2008]. In these novel environments, pathogens may experience new selective forces acting at  
8 multiple biological scales, leading to reduced replication rates within hosts or less efficient  
transmission between hosts. When these novel environments are sufficiently harsh, emergence only  
10 occurs when the pathogen adapts sufficiently quickly to avoid extinction. As genetic sequencing of  
pathogens becomes increasingly widespread, there are clear signs of such rapid adaptation [Steel  
12 et al., 2009, Lowder et al., 2009, Xu et al., 2014, Jonges et al., 2014, Zhu and Shu, 2015, Lam  
et al., 2015, Xiang et al., 2018], but we lack a cohesive framework to understand how this process  
14 might work across scales. Theoretical studies have shed important insights into circumstances  
under which this evolutionary emergence is possible, but either have focused on the host-to-host  
16 transmission dynamics and treated within-host dynamics only implicitly [Antia et al., 2003, Iwasa  
et al., 2004, André and Day, 2005, Park et al., 2013], or have accounted for explicit within-host  
18 dynamics only along a fixed transmission chain [Peck et al., 2015, Geoghegan et al., 2016b]. Here,  
we introduce and analyze a model explicitly linking these two biological scales and demonstrate  
20 how within-host viral competition, infection duration, transmission dynamics within a host  
population, and the size of transmission bottlenecks determine the likelihood of evolutionary  
22 emergence. This analysis sheds new light on factors governing pathogen emergence, addresses  
long-standing questions about evolutionary aspects of emergence, and lays the foundation for  
24 making risk assessments which integrate outcomes from *in vitro* and *in vivo* experiments with  
findings from sequence-based surveillance in the field.

26 Recent empirical findings have highlighted the need for a new generation of theory on pathogen  
emergence, which addresses the current frontiers of dynamics within hosts and across scales. For  
28 most pathogens, and certainly for RNA viruses and single-stranded DNA viruses, individual hosts

often are not dominated by single pathogen genotypes [Grenfell et al., 2004, Pybus and Rambaut, 2009]. Furthermore, at the host population scale, pathogen allele frequencies at a given locus exhibit a range of dynamics from rapid selective sweeps for drug resistance or immune escape [Pennings et al., 2014, Lim et al., 2007, Kijak et al., 2017] to gradually changing frequencies [Domingo et al., 2012, Linster et al., 2014]. Together, these observations lead to the long-standing question of whether adaptive evolution of viruses occurs within single hosts by rapid fixation of beneficial mutants, or more slowly by a gradual shift of allele frequencies along chains of transmission [Lemey et al., 2006, Holmes, 2007]. A recent wave of studies tracking changes in within-host genetic diversity through chains of transmission among hosts [Murcia et al., 2010, Bull et al., 2012, Hughes et al., 2012, Stack et al., 2012, Morelli et al., 2013, Orton et al., 2013, Vrancken et al., 2014] provide unique opportunities to address this question, but a theoretical framework is needed.

Empirical studies, together with analyses at broader population scales, have highlighted the crucial influence of the transmission process – and particularly the population bottleneck associated with transmission – in filtering viral diversity. The existence of transmission bottlenecks has long been recognized, and is hypothesized to play a critical role in pathogen evolution [Duarte et al., 1992, Bergstrom et al., 1999, Novella et al., 1999, Zwart and Elena, 2015, McCrone and Lauring, 2018, LeClair and Wahl, 2018]. Recent studies have reported that bottleneck widths vary considerably among pathogens and routes of transmission [Varble et al., 2014, Frise et al., 2016], and perhaps across different phases of host adaptation [Moncla et al., 2016]. Narrow transmission bottleneck sizes of 1 to 2 viral genotypes are common for HIV-1 [Keele et al., 2008, Tully et al., 2016, Kariuki et al., 2017] and hepatitis C virus [Wang et al., 2010, Bull et al., 2011], and bottlenecks of 1 to 3 viruses are reported for influenza in ferret respiratory droplet transmission experiments [Wilker et al., 2013, Varble et al., 2014, Frise et al., 2016] and in some studies of natural human transmission [McCrone et al., 2018]. Much wider bottleneck estimates, of 30 to over 100 viruses, have been reported for natural transmission of influenza in horses [Hughes et al., 2012], swine [Murcia et al., 2012] and humans [Poon et al.,

2016, Leonard et al., 2017]; for ferret transmission experiments via direct contact [Varble et al., 2014, Frise et al., 2016]; and for transmission of Ebola virus among humans [Emmett et al., 2015].

A major frontier in understanding viral adaptation is how the transmission process influences evolution at population scales. Past work has emphasized the potentially deleterious effect of genetic drift [Duarte et al., 1992, Novella et al., 1999, McCrone and Luring, 2018], but a rising tide of studies reports direct selection for transmissibility. This can arise as a strong selection bias at the transmission bottleneck, where strains present at low or undetectable frequencies in the donor host are preferentially transmitted to the recipient [Boeras et al., 2011, Wilker et al., 2013, Carlson et al., 2014, Moncla et al., 2016], or it can be measured directly via experimental infection and transmission studies [Hurt et al., 2010, McCaw et al., 2011, Imai et al., 2012, Linster et al., 2014] (though we emphasize that enhanced transmissibility is not inevitable, and depends on availability of suitable adaptive genotypes [Zaraket et al., 2015]). Overall transmission rates are thus determined by total viral loads, weighted by genotype-specific transmissibilities [Carlson et al., 2014]. Importantly, the transmissibility trait can vary independently from viral replication fitness within hosts, so there is potential for conflicts in selection across scales. Indeed, there is clear evidence that HIV-1 has certain genotypes that transmit more efficiently, but then the within-host population tends to evolve toward lower-transmission strains during an infection [Shaw and Hunter, 2012, Alizon and Fraser, 2013, Carlson et al., 2014, Kariuki et al., 2017]; a similar phenomenon has been reported for H5N1 influenza [Wilker et al., 2013] and H9N2 influenza [Sorrell et al., 2009]. In an extreme example, *Plasmodium* parasites were found to rapidly evolve resistance to an antimalarial drug, but at the cost of complete loss of transmissibility [Goodman et al., 2016]. Experimental evolution studies have highlighted how antagonistic pleiotropy can lead to tradeoffs between viral replication and the extracellular survival that is required for transmission [De Paepe and Taddei, 2006, Wasik et al., 2015], and a similar tradeoff has been postulated for environmental transmission of avian influenza in the field [Handel et al., 2013]. Together these findings contribute to a growing evidence base that cross-scale conflicts in selection may inhibit the emergence of new viral strains in many systems (reviewed in [Park et al., 2013]).

Collectively these empirical findings highlight the need for a theory of evolutionary emergence that accounts explicitly for the within-host dynamics of competing viral strains, transmission bottlenecks, and host-to-host transmission dynamics [Gog et al., 2015]. To this end, we introduce and analyze a model which integrates previous work on stochastic models of evolutionary emergence and deterministic models explicitly coupling within- and between-host dynamics [Antia et al., 2003, André and Day, 2005, Mideo et al., 2008, McCaw et al., 2011, Peck et al., 2015, Geoghegan et al., 2016b]. Our analysis allows us to address several fundamental questions about the emergence of novel pathogens: What factors limit evolutionary emergence for pathogens with different life histories? Why do some apparently ‘nearby’ adaptive mutants fail to emerge? How do bottleneck sizes influence the likelihood of emergence? Do evolutionary changes occur swiftly within individual hosts, or gradually across chains of transmission? Moreover, our analysis allows us to examine the relative importance of genetic diversity in zoonotic reservoirs versus the acquisition of new mutations following spillover into humans [Parrish et al., 2008, Woolhouse et al., 2012a, Orr and Unckless, 2014]. Specifically, we address the long-standing question of how much is emergence risk increased if the “spillover inoculum” includes some genotypes bearing adaptive mutations for the novel host? Finally, our analysis enables us to unify findings from previous theoretical studies, and propose mechanistic interpretations of phenomenological parameters from earlier work.

## MODELS AND METHODS

Our stochastic multi-scale model of evolutionary emergence follows a finite number of individuals in a large, susceptible host population exposed to a pathogen from a reservoir population (Fig 1A). Although our framework represents many types of pathogens and can be extended to any number of strains, we focus on the case of a viral pathogen with two strains: a wild-type maladapted for the novel environment and a mutant strain potentially adapted for the novel environment.

**The cross-scale model with explicit within-host dynamics.** In our model, described more formally below, each infected individual begins with a viral load of size  $N$  (the size of the

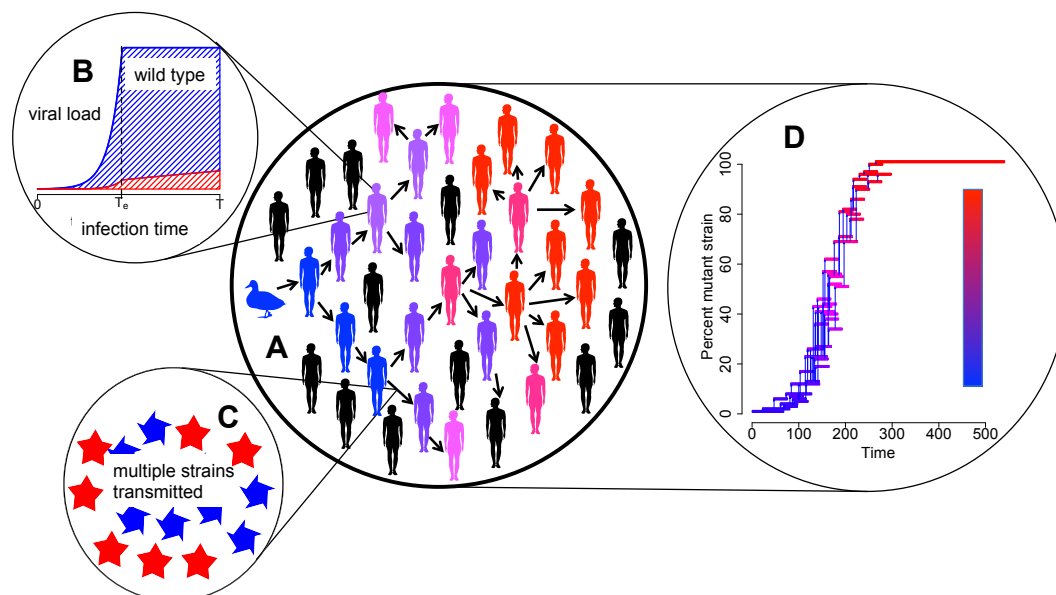

FIGURE 1. *The cross-scale dynamic of evolutionary emergence.* An individual is initially infected from the reservoir host population (panel A) with only the wild type viral strain (in blue). Within an infected individual (panel B), the viral load increases at an exponential rate until saturating at day  $T_e$  and ending after  $T$  days. Mutations ensure individuals typically have a mixed infection with wild-type (blue) and mutant (red) viral strains (panel B). The likelihood of transmission between individuals, and the composition of the infecting dose (panel C), depend on the size and composition of the infected individual's viral load at the time of contact, and on the transmissibility of each strain. As the infection spreads in the population (panel A), the frequency of the mutant virions among infected individuals varies (panel D) and, ultimately, determines whether evolutionary emergence occurs. In D, each horizontal line marks the infectious period of an individual whose infection was initiated with that percentage of the mutant strain and the vertical arrows represent transmission events between individuals.

transmission bottleneck) consisting of mixture of wild-type and mutant virions. The viral  
 2 populations increase exponentially until saturating at time  $T_e$  with a maximal viral load  $K$  at  
 which the viral replication rate is balanced by the viral clearance rate (Fig 1B). The wild and  
 4 mutant strains increase exponentially at rates,  $r_w$  and  $r_m$ , and mutations arise with probability  $\mu$ .  
 The infectious period ends after  $T$  days. This within-host model can describe a range of viral  
 6 dynamics from infections with primarily an exponential phase of viral growth to infections  
 maintaining a stable viral load for an extended period.

8 At the scale of the host population, the transmission dynamics along chains of hosts is  
 stochastic. Each infectious individual encounters a Poisson-distributed number of susceptible

individuals at a rate of  $\beta$  individuals per day. Encounters result in a transmission event with probability  $p(E)$  where  $E = b_w v_w(t) + b_m v_m(t)$  is the effective viral load at the time  $t$  of transmission,  $b_w, b_m$  are the transmissibilities of the viral strains, and  $p(E)$  is an increasing function of  $E$ . Our main analyses assume that the transmission function  $p(E)$  is linear, but nonlinear transmission functions yield nearly identical results (Figs. [Appendix–2](#) through 4). When transmission occurs, a newly infected individual is infected with  $N$  virions (the transmission bottleneck width) sampled binomially from the source individual’s viral load weighted by the transmissibilities of the viral strains. After a transmission event, the newly infected individual’s viral load is governed by the within-host model. By explicitly modeling the cross-scale dynamics, our model simultaneously tracks the number of infected hosts and the viral loads within each infected host (Fig 1D). The structure of our model is similar to [Peck et al. \[2015\]](#)’s model of molecular viral evolution along transmission chains. However, our model accounts for stochastic transmission dynamics rather than conditioning on a chain of transmission, and explicitly accounts for the dynamics of competing viral strains. It also has similarities with [Geoghegan et al. \[2016b\]](#)’s cross-scale model of a single transmission event from a donor host to a recipient host. Like our model, [Geoghegan et al. \[2016b\]](#)’s model has constant transmission bottlenecks, multinomial sampling from donor to host, and explicit within host dynamics with exponential growth and ceiling phases. Their model, however, only follows one transmission event and assumes that all virions are equally likely to be transmitted from donor to host, i.e. no selection based on transmissibility.

More formally, our model is a continuous time, age-dependent, multi-type branching process [[Harris, 2002](#), [Athreya and Ney, 2004](#)]. The “type” of individual corresponds to their initial viral load, and the “age” of an individual corresponds to the time since their initial infection. Within an infected host, the viral dynamics determine how the viral load and composition changes over time due to competition between strains and mutation events. Transmission events are determined by the viral load and composition of the host and, consequently, are age-dependent.



Due to ultimately large viral loads, the within-host dynamics are modeled with coupled differential equations where  $v(t) = (v_w(t), v_m(t))$  denotes the vector of viral abundances

$$(1) \quad \frac{dv_i}{dt} = \begin{cases} (1 - \mu)r_i v_i + \mu r_j v_j & \text{if } v_w + v_m \leq K \\ (1 - \mu)r_i v_i + \mu r_j v_j - \frac{v_i}{v_w + v_m} (r_w v_w + r_m v_m) & \text{else} \end{cases}$$

where  $i \neq j$  are either  $w$  or  $m$ . At time  $t = 0$ ,  $v(0) = (v_w(0), v_m(0))$  corresponds to the initial viral load of an infected individual.

The number of contacts of an infected individual during the infectious period is Poisson distributed with mean  $\beta T$ . On the event of a contact at  $t$  days after becoming infected, the probability of transmission is  $p(b_w v_w(t) + b_m v_m(t))$ . On the event of transmission, the probability of infecting an individual with a viral load of  $\tilde{v} = (\tilde{v}_w, \tilde{v}_m)$  with  $\tilde{v}_w + \tilde{v}_m = N$  equals

$$\psi(v(t), \tilde{v}) = \frac{N!}{\tilde{v}_w! \tilde{v}_m!} \left( \frac{b_w v_w(t)}{b_w v_w(t) + b_m v_m(t)} \right)^{\tilde{v}_w} \left( \frac{b_m v_m(t)}{b_w v_w(t) + b_m v_m(t)} \right)^{\tilde{v}_m}.$$

Under these assumptions, during their infectious period, an infected individual of type  $v(0)$  infects a Poisson distributed number of individuals with viral load  $\tilde{v}$  and the mean of this distribution equals

$$F(v(0), \tilde{v}) = \int_0^T \beta \psi(v(t), \tilde{v}) p(b_w v_w(t) + b_m v_m(t)) dt.$$

**Methods.** To solve the probabilities of emergence, we use the discrete-time branching process given by censusing the infected population at the beginning of each generation of infection. This discrete-time process is known as the embedded process [Harris, 2002, Athreya and Ney, 2004].

All the statistics of this embedded process are given by the probability generating map  $G : [0, 1]^{N+1} \rightarrow [0, 1]^{N+1}$  where  $N + 1$  is the number of types of initial viral loads [Harris, 2002, Athreya and Ney, 2004]. We index the coordinates by the initial number of mutant virions  $0, 1, 2, \dots, N$  within an infected individual and have

$$G_i(s) = \exp \left( \sum_j F((i, N - i), (j, N - j))(s_j - 1) \right).$$

The  $i$ -th coordinate of

$$q(t) = G^t(0, \dots, 0)$$

is the probability of extinction by generation  $t$  when there is initially one infected individual with  
2 initial viral load  $(i, N - i)$ . The probability of emergence is given by  $1 - q$  where  $q = \lim_{t \rightarrow \infty} q(t)$   
is the asymptotic extinction probability. The limit theorem of branching processes implies that  
4  $q = (q_0, \dots, q_N)$  is the smallest (with respect to the standard ordering of the positive cone),  
non-negative solution of the equation  $q = G(0, \dots, 0)$ .

6 For the numerical work, we used linear, logarithmic, and saturating functions for the  
transmission probability function  $p$ . All gave similar results but we present the linear case as most  
8 analytical results were derived for this case. To compute the asymptotic extinction probabilities,  
we iterated the probability generating map  $G$  for 2,000 generations. For the individual based  
10 simulations, we solved the within-host differential equations using matrix exponentials and  
renormalizing these exponentials when the viral load reached the value  $K$ . Between host  
12 transmission events where determined by a time-dependent Poisson process with rate function  
 $p(b_w v_w(t) + b_m v_m(t))$  and multinomial sampling was used to determine the initial viral load of an  
14 infected individual.

## RESULTS

16 **The probability of evolutionary emergence.** We first focus on the scenario of a single  
individual in the host population getting infected by the wild-type strain. We assume that the  
18 mean number of individuals infected by this individual (the reproductive number  $R_w$  of the  
wild-type) is less than one. Hence, in the absence of mutations, there is no chance of a major  
20 outbreak [Diekmann and Heesterbeek, 2000]. However, if the wild-type strain produces a mutant  
strain whose reproductive number  $R_m$  is greater than one, there is a chance for a major outbreak.  
22 The mutant strain might have a higher reproductive number than the wild-type strain because it  
replicates more rapidly within the host or because it transmits more effectively to new hosts (or  
24 both). We define these within-host and between-host selective advantages as  $s = r_m - r_w$  and  
 $\tau = \log(b_m) - \log(b_w)$ , respectively.

26 Consistent with theoretical expectations, a non-zero probability of evolutionary emergence  
requires the mutant's reproductive number  $R_m$  to be greater than one (Fig 2). However, the

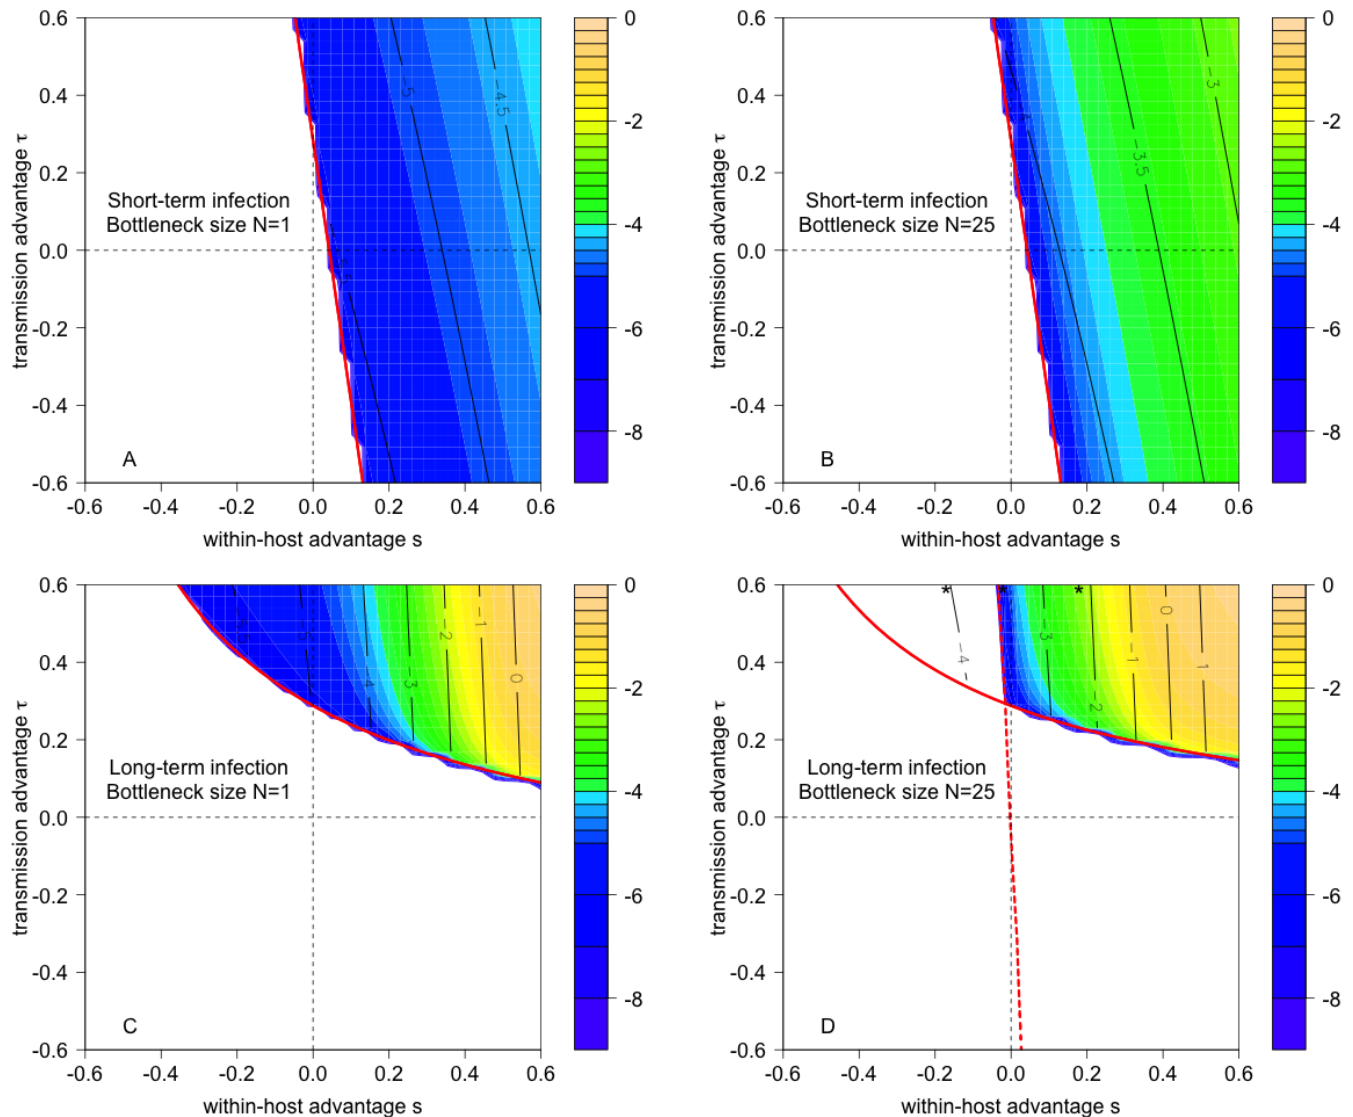

FIGURE 2. The joint effects of within-host and between-host selective advantage of the mutant on the probability of emergence for pathogens with short-term (A,B) and long-term (C,D) infectious periods, and with transmission bottlenecks of size  $N = 1$  (A,C) and  $N = 25$  (B,D). Colorations correspond to  $\log_{10}$  of the emergence probability. The critical value of the mutant reproductive number  $R_m$  equaling one is drawn in solid red. Black contour lines correspond to  $\log_{10}$  of the number of mutant virions transmitted by an individual initially only infected with the wild strain. In D, the critical value of the cross-scale reproductive number,  $\alpha = 1$ , is shown as a red dashed line and the black asterisks correspond to the  $\tau$  and  $s$  values used in Fig 3. Parameters:  $K = 10^7$ ,  $\beta T = 30$ ,  $T = 7.5 < 12.9 = T_e$  (short-term infection) and  $T = 30 > 12.9 = T_e$  (long-term infection),  $b_w$  chosen so that  $R_0 = 0.75$  for wild type,  $r_w = 1.25$  and  $\mu = 10^{-7}$ .

mixture of selective advantages or disadvantages of the mutant strain that give rise to  $R_m > 1$   
2 depends in a complex manner on the pathogen's life history traits, such as the duration of the  
infection (Fig 2A,B vs. C,D) and the transmission bottleneck width (Fig 2A,C vs. B,D). Notably,  
4 for long-term infections with a large transmission bottleneck size, the emergence probability can  
be effectively zero (i.e.  $< 10^{-16}$ ) for mutant strains whose reproductive number exceeds one (white  
6 region bounded by the solid red curve in Fig 2D).

To understand these complexities, we determine the conditions under which the mutant's  
8 reproductive number  $R_m$  exceeds one, and then present analytic approximations for the emergence  
probability when  $R_m > 1$ .

10 **Cross-scale selection and the mutant reproductive number  $R_m$ .** The reproductive  
numbers of the wild-type strain ( $R_w$ ) and mutant strain ( $R_m$ ) can be calculated as the product of  
12 the contact rate, the average transmissibility of the strain during the infectious period, and the  
infection duration (see Appendix). These reproductive numbers are positively correlated with the  
14 contact rate, infection duration, transmissibility, and viral per-capita growth rates. The influence  
of the maximal viral load  $K$  depends on the infection duration. For short-term infections, defined  
16 here as infections with a relatively short saturated phase (i.e.  $T - T_e \ll T_e$ ), increasing  $K$  has  
little effect on a strain's reproductive number. For long-term infections, defined here as  
18 infections with a long saturated phase (i.e.  $T - T_e \gg T_e$ ), reproductive numbers increase with  $K$ .

Whether a selective advantage at either scale results in the mutant reproductive number  $R_m$   
20 exceeding one depends on the duration of the infection. For short-term infections, most  
transmissions occur towards the end of the infectious period  $T$ , when the infectious load is the  
22 highest. By the end of the infectious period, the density of the mutant viral density has increased  
approximately by a factor of  $e^{sT}$  more than the wild-type, and transmission for a mutant virion is  
24  $\exp(\tau)$  more likely than for a wild type virion. Refining this intuition, we derive the  
approximation (Appendix)

$$(2) \quad \log R_m \approx \log R_w + \tau + s(T - 1/r_w).$$

This approximation shows that a sufficiently strong selective advantage at either scale can result in the mutant reproductive number exceeding one ( $R_m > 1$ ) despite a selective disadvantage at the other scale (confirmed by exact calculations in Fig 2A,B). For short-term infections where viral dynamics are dominated by the exponential phase, the longer the duration of infection, the greater the influence of the within-host selective advantage compared to the between-host selective advantage (e.g., steep contours in Fig 2A).

For long-term infections, the viral load will tend to  $K$  for both purely wild-type or purely mutant infections. Thus, the only difference will be in transmissibility and we get the approximation (Appendix)

$$(3) \quad \log R_m \approx \log R_w + \tau.$$

This approximation implies that a between-host selective advantage is required for evolutionary emergence (confirmed by exact calculations in Fig 2C). When viral dynamics are dominated by the saturated phase at fixed  $K$ , a within-host selective advantage has little impact on the average viral load during the infectious period of an individual solely infected with the mutant strain and, consequently, provides a minimal increase in the mutant reproductive number.

**Going beyond the mutant reproductive number.** When the mutant strain has a reproductive number greater than one, there is a non-zero probability of a major outbreak that is well-approximated by the product of three terms (compare Fig. 2 to Fig. Appendix-6):

$$(4) \quad \left\{ \begin{array}{l} \text{mean size of a minor} \\ \text{outbreak due to the} \\ \text{wild type} \end{array} \right\} \times \left\{ \begin{array}{l} \text{mean \# individuals infected} \\ \text{with one mutant virion by an} \\ \text{individual infected initially with} \\ \text{only the wild type} \end{array} \right\} \times \left\{ \begin{array}{l} \text{probability an indi-} \\ \text{vidual infected with} \\ \text{one mutant virion} \\ \text{causes a major out-} \\ \text{break} \end{array} \right\}$$

This expression, which can be viewed a multi-scale extension of earlier theory [Antia et al., 2003, Iwasa et al., 2004], highlights three key ingredients, in addition to  $R_m > 1$ , for evolutionary emergence.

First, the size of the minor outbreak produced by the wild type determines the number of opportunities for the mutant strain to appear within a host. The average size of this minor

outbreak equals  $\frac{1}{1-R_w}$ , as noted by earlier studies [Antia et al., 2003, Iwasa et al., 2004]. If the wild strain is badly maladapted (e.g.  $R_w < 1/2$ ), then it is expected not to spread to multiple individuals (i.e.  $\frac{1}{1-R_w} < 2$ ) and opportunities for transmission of mutant virions are very limited. Alternatively, if the wild strain is only slightly maladapted to the new host (e.g.  $R_w = 0.95$ ), then, even without any mutations, the pathogen is expected to spread to many individuals (e.g.  $\frac{1}{1-R_w} = 20$ ), thereby providing greater opportunities for evolutionary emergence. Our analysis implies that higher contact rates, within-host viral growth rates, viral transmissibility, and maximal viral loads (for long infectious periods) facilitate these larger reproductive values.

Second, the mutant strain must be transmitted successfully to susceptible individuals — the second term of our approximation (4). For an individual initially infected only with the wild-type strain, the mean number of transmission events with mutant virions equals the product of the contact rate, the infection duration, and the likelihood that a mutant virion is transmitted during a contact event, averaged over the full course of infection (Appendix). The likelihood of transmitting mutant virions on the  $t^{\text{th}}$  day of infection is proportional to the product of the transmission bottleneck width ( $N$ ), the within-host frequency of the mutant strain, and the transmissibility  $b_m$  of the mutant strain. This highlights an important distinction between short-term and long-term infections. For short-term infections where  $sT$  is small, there is insufficient time for the frequency of mutants to rise within a host, so transmission events with mutant virions are rare ( $< 1/1,000$  for all black contour lines in Fig 2A,B). This is a key obstacle to evolutionary emergence in short-term infections. In contrast, for long-term infections where the mutant strain has a substantial within-host selective advantage, the mutant strain is transmitted frequently (e.g. the expected number of events  $> 1$  for some contours in Fig 2C,D).

Finally, even if the mutant strain is successfully transmitted, an individual infected with the mutant strain needs to give rise to a major outbreak — the third term of equation (4). This requires the mutant strain to rise in frequency in the infected host population. A mean field analysis for larger bottleneck sizes ( $N > 5$  in the simulations) reveals that mutant frequency initially grows geometrically by a factor  $\alpha$  that equals the number of mutant virions, on average, transmitted by an individual initially infected with a single mutant virion and  $N - 1$  wild type

virions (Appendix). We call  $\alpha$  the cross-scale reproductive number as it corresponds to the  
2 number of mutant virions at the beginning of the next disease generation produced by a mutant  
virion in the current disease generation. If this cross-scale reproductive number is greater than  
4 one, then each mutant virion replaces itself with more than one mutant virion in the next  
generation of infection and the frequency of mutant virions increases in the infected host  
6 population. If the cross-scale reproductive number  $\alpha$  is less than one, the frequency of mutants  
decreases, thereby hindering evolutionary emergence.

8 For short-term infections, the cross-scale reproductive number  $\alpha$  is equal to the ratio of the  
base reproductive numbers:

$$(5) \quad \alpha = \frac{R_m}{R_w}$$

10 Thus for short-term infections there is no additional condition required for emergence. Whenever  
the mutant reproductive number  $R_m$  exceeds one, there is a mean tendency for the mutant strain  
12 to increase in frequency once it has been successfully transmitted to susceptible individuals (i.e.  
 $\alpha > 1$  because  $R_m > 1 > R_w$ ). The greater the ratio  $R_m/R_w$ , the more rapid the increase in  
14 frequency.

For long-term infections, there is sufficient time for within-host selection to change the  
16 frequency of the mutant strain within a host. Larger transmission bottlenecks increase the  
likelihood that these changes in frequency are transmitted between hosts. For these long infectious  
18 periods and larger bottlenecks, a within-host selective disadvantage reduces the cross-scale  
reproductive number  $\alpha$  (Appendix):

$$(6) \quad \alpha \approx \exp(\tau + sT/2) \text{ for } s \text{ sufficiently small.}$$

20 Hence, the cross-scale reproductive number  $\alpha$  may be less than one even when the mutant  
reproductive number  $R_m$  is greater than one. This phenomenon, which arises from the interplay of  
22 dynamics at within-host and between-host scales, moderated by the transmission bottleneck  
width, explains the puzzling behavior about the emergence probabilities noted earlier (the white  
24 region bounded by solid and dashed red lines in Fig 2D).

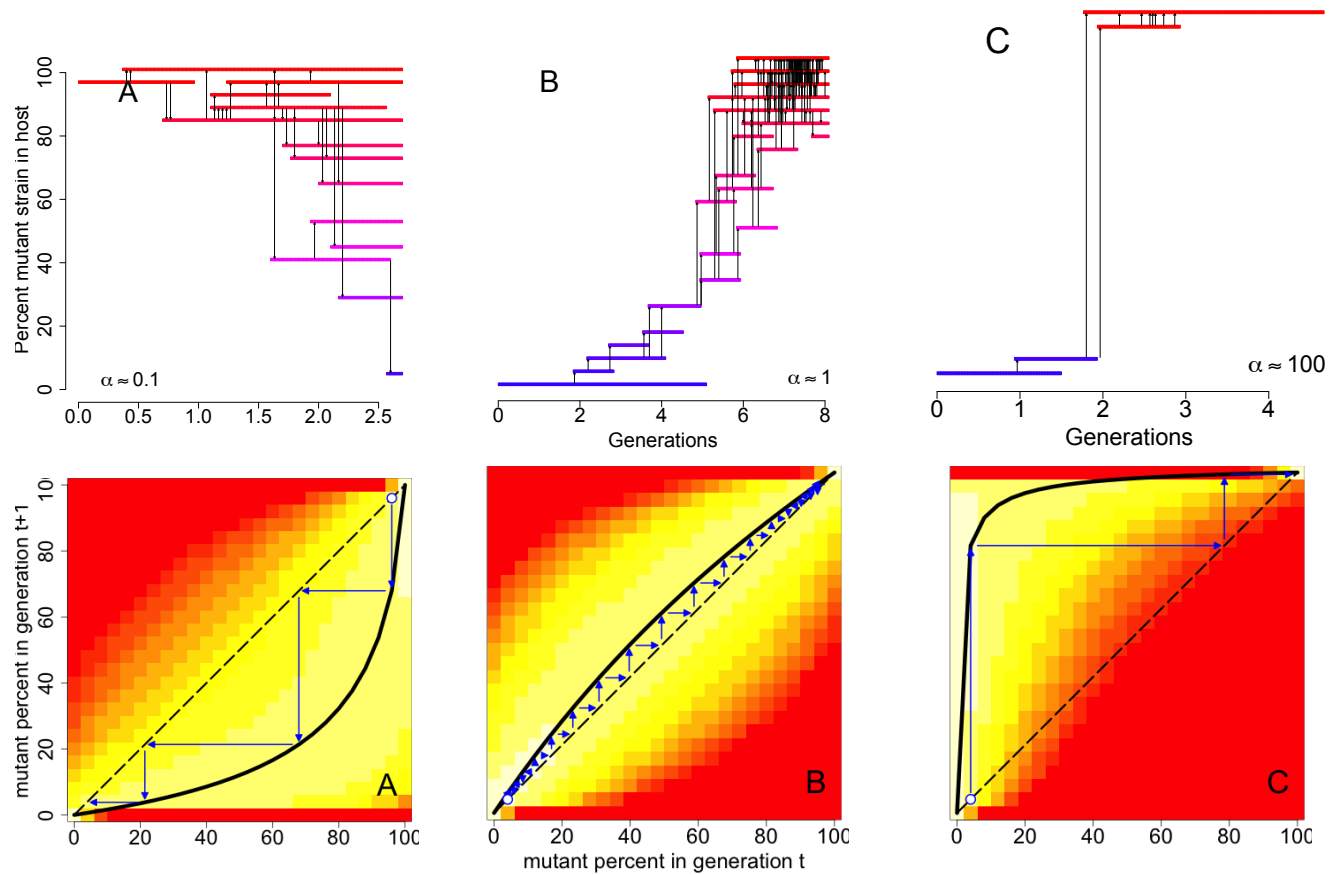

FIGURE 3. *Frequency dynamics of the mutant strain in the host population.* For long-term infections with moderate to large transmission bottlenecks ( $N > 5$ ), individual-based simulations corresponding to three values of the cross-scale reproductive number  $\alpha$  illustrate (A) the mutant strain decreasing in frequency (despite an index case initially only infected with the mutant strain) when the cross-scale reproductive number  $\alpha$  is less than one, (B) a gradual sweep to fixation of the mutant strain when  $\alpha \approx 1$ , and (C) fast sweeps to fixation for large values of  $\alpha > 1$ . In these individual based simulations, each horizontal line marks the infectious period of an individual whose infection was initiated with that percentage of the mutant strain and the vertical arrows represent transmission events between individuals. In the bottom half of the figure, the mean field dynamics corresponding to each of the individual-based simulations are plotted as cobwebbing diagrams. The solid black curves correspond to the expected frequency of the mutant strain in the infected host population in the next generation given the frequency in the current generation. Thin blue lines indicate how the expected frequencies change across multiple generations. The colored backgrounds represent the expected number of individuals infected with a certain percentage of the mutant strain (vertical axis) by an individual with an initial percentage of the mutant strain (horizontal axis). Lighter colors correspond to higher values. Parameter values as in Fig 2D indicated with black asterisks.



The importance of these frequency dynamics can be visualized via individual-based outbreak simulations, and cobwebbing diagrams summarizing the mean field dynamics. When the mutant reproductive number  $R_m$  is greater than one but its cross-scale reproductive number  $\alpha$  is less than one, mutant virions may be transmitted but the resulting mixed infections are invariably taken over by purely wild-type infections (Fig 3A). Only pure mutant infections can escape this “relapse” to wild-type, and then only if the mutation rate  $\mu$  is low enough that new wild-type virions are slow to appear. When the within-host selective disadvantage is weak and the between-host selective advantage is strong, the cross-scale reproductive number may be slightly greater than one and the mutant strain can drift to higher frequencies within the infected host population (Fig 3B). For large within-host selective advantages, the cross-scale reproductive number is large and the mutant strain can sweep rapidly to fixation in the infected host population (Fig 3C). Thus, in addition to revealing a new condition needed for evolutionary emergence, the cross-scale reproductive number  $\alpha$  summarizes the conditions under which evolution occurs swiftly or gradually within chains of transmission.

**The dueling effects of transmission bottlenecks.** Wider bottlenecks increase the likelihood of evolutionary emergence for pathogens with a short infectious period, but can hinder or facilitate evolutionary emergence of long-term infections (Fig 4A,B). For short-term infections, evolutionary emergence is constrained primarily by the transmission of mutant virions by individuals initially infected with only the wild strain. Wider transmission bottlenecks alleviate this constraint, especially when the mutant strain is expected to increase rapidly within the infected population ( $\alpha \gg 1$ ; Fig 4A). When the mutant strain rises slowly in the infected host population ( $\alpha$  slightly greater than one), the emergence probability is insensitive to the bottleneck size, regardless of infection duration.

For long-term infections for which the mutant strain’s reproductive number  $R_m$  is greater than one, but the cross-scale reproductive number  $\alpha$  is less than one, emergence probabilities decrease sharply with bottleneck size (Fig 4B and Appendix). Because a mutant reproductive number  $R_m$  greater than one requires a between-host selective advantage ( $\tau > 0$ ) for a long-term infection, the cross-scale reproductive number  $\alpha$  is less than one only if there is a within-host selective

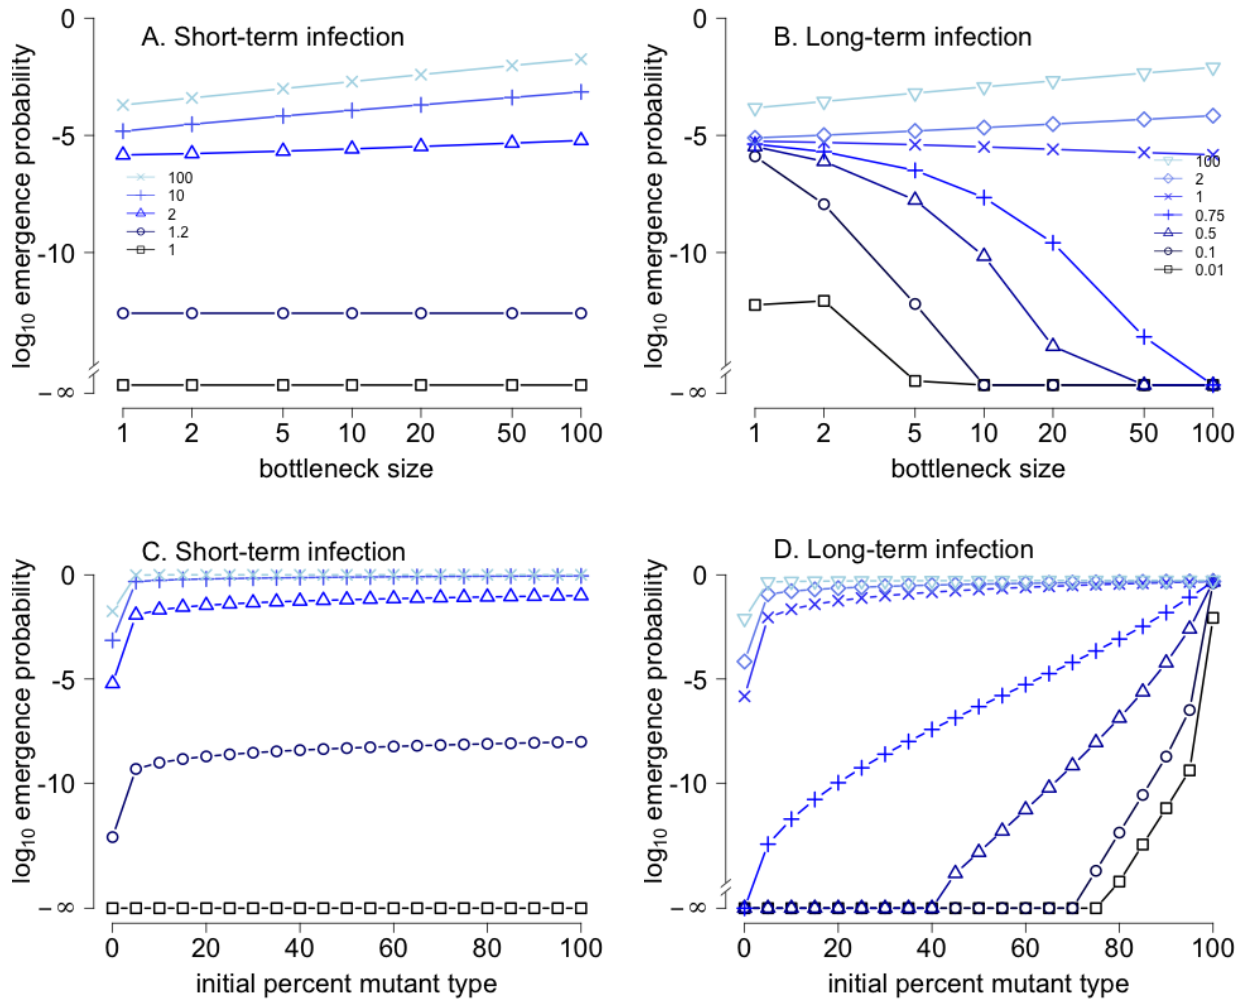

FIGURE 4. Effects of bottleneck size and mixed infections of the index case on evolutionary emergence of short-term and long-term infections. Different curves correspond to different tendencies, as measured by the cross-scale reproductive number  $\alpha$ , for the mutant strain to increase in frequency in the infected host population. In (A) and (B), bottleneck size has negative effect on emergence when the cross-scale reproductive number  $\alpha$  is less than one and a positive effect when  $\alpha$  is greater than one. In (C) and (D), index cases initially infected with higher percentages of the mutant strain are more likely to lead to emergence.  $-\infty$  corresponds to numerical values of  $10^{-16}$  or smaller. Parameters:  $K = 10^7$ ,  $\beta T = 150$ ,  $T = 7.5$  for short-term infections and  $T = 30$  for long-term infections,  $b_w$  chosen so that  $R_0 = 0.75$  for the wild strain,  $r_w = 1.25$ ,  $\tau = 1$ ,  $s$  chosen to achieve the  $\alpha$  values reported in the legend, and  $\mu = 10^{-7}$ .  $N = 25$  in (C) and (D).

disadvantage ( $s < 0$ ) so that mixed infections tend to be taken over by the wild-type.

- Consequently, the mutant virus can start an epidemic only when a host is infected with mutant particles only, an event that becomes increasingly unlikely for larger bottleneck sizes  $N$ .

**Mutant spillover events hasten evolutionary emergence.** When the mutant strain is

2 circulating in the reservoir, the index case can begin with a mixed infection which invariably  
makes evolutionary emergence more likely (Fig 4C,D). For short-term infections, spillover doses  
4 that contain low or high frequencies of mutants have a roughly equal impact on emergence, and  
the magnitudes of these increases are relatively independent of the cross-scale reproductive  
6 number  $\alpha$  (Fig 4C). This arises because the initial production and transmission of the mutant  
strain is the primary constraint on evolutionary emergence for short-term infections with  $R_m > 1$   
8 (black contours in Fig 2A,B). Consequently, mutant spillover events of any size are sufficient to  
overcome this constraint.

10 For long-term infections, the impact of mutant spillover depends on the cross-scale reproductive  
number  $\alpha$ . When  $\alpha$  is less than one, only spillover doses with high frequencies of mutants have a  
12 significant effect on emergence (i.e. bottom three curves in Fig 4D). When the cross-scale  
reproductive number  $\alpha$  is greater than one, the effect mimics short-term infections and mutant  
14 spillover events of any size can substantially increase the chance of emergence (top three curves in  
Fig 4C,D).

16

## DISCUSSION

We have presented a cross-scale model for evolutionary emergence of novel pathogens, linking  
18 explicit representations of viral growth and competition within host individuals to viral  
transmission between individuals. This framework integrates and extends the findings of past  
20 theory on this problem by including mixed infections, explicit transmission bottlenecks, and a  
distinct trait of transmissibility for each viral genotype, phenomena that are highlighted by  
22 current empirical research as essential components of viral evolution. Our work identifies four  
steps to evolutionary emergence (Fig 5) and four ingredients that govern these steps: (i) the  
24 reproductive number of the wild type which determines the size of a minor outbreak of this strain,  
(ii) the rate at which individuals infected initially with the wild-type strain transmit the mutant  
26 strain, and (iii) the cross-scale reproductive number which corresponds to the mean number of  
mutant virions transmitted by an individual whose initial infection only included one mutant

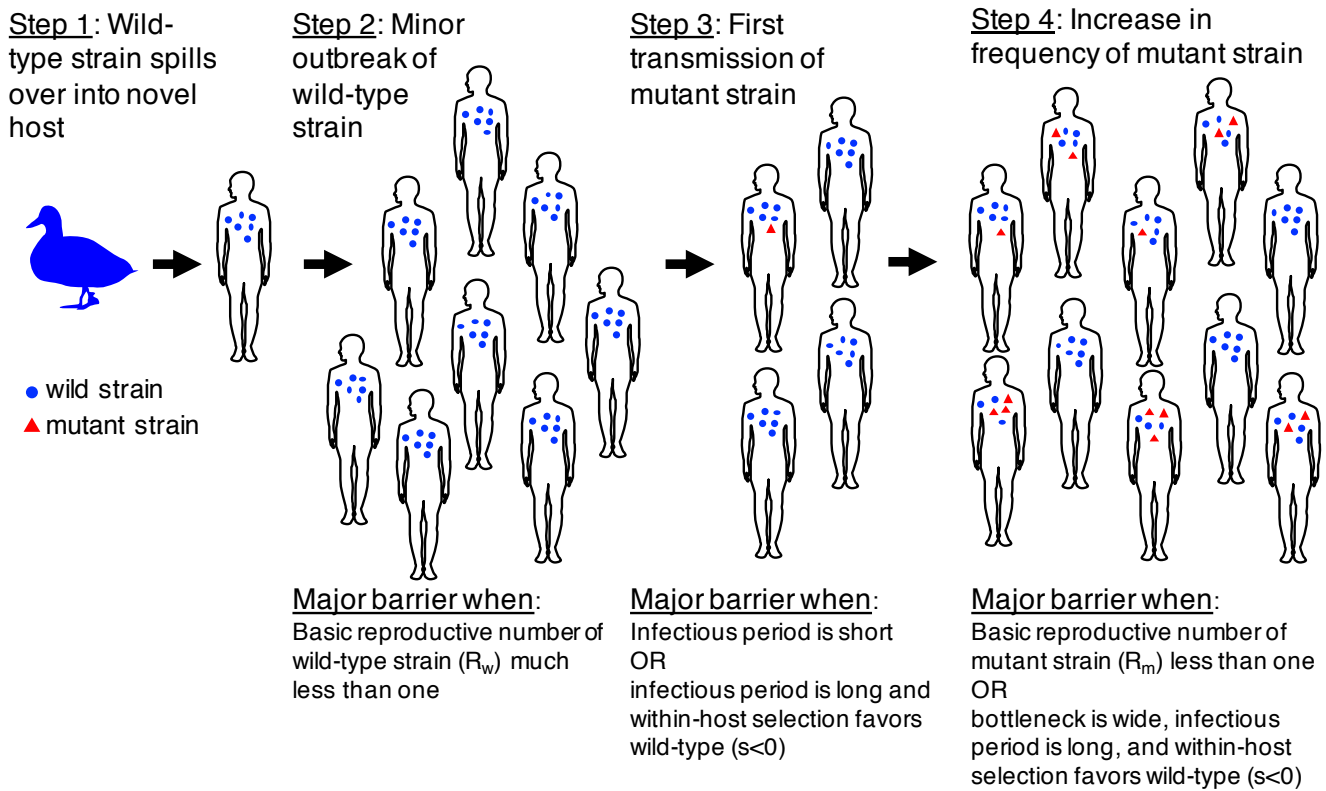

FIGURE 5. The major steps and barriers for evolutionary emergence.

virion, and (iv) the reproductive number of the mutant strain. Prior studies [Antia et al., 2003, Iwasa et al., 2004, André and Day, 2005, Park et al., 2013] identified the importance of the two single strain reproductive numbers,  $R_m$  and  $R_w$ , and a phenomenological ‘mutation rate’, but ingredients (ii) and (iii) are new mechanistic insights arising from the cross-scale dynamics. By analyzing these ingredients of evolutionary emergence, we show how the probability of emergence is governed by selection pressures at within-host and between-host scales, the width of the transmission bottleneck, and the infection duration. We also map the conditions under which different broad-scale patterns are observed, from rapid selective sweeps to slower diffusion of new types. While our study has focused on within-host and between-host scales of selection, it could be generalized readily to other types of cross-scale dynamics where selection may act differently at different scales, such as within-farm and between-farm scales where genetic data have given insights into the emergence of high-pathogenicity avian influenza strains [Fusaro et al., 2016].

Previous studies of evolutionary emergence of pathogens [Antia et al., 2003, Iwasa et al., 2004, André and Day, 2005, Park et al., 2013] have assumed infected individuals are, at any point in time, infected primarily by a single pathogen strain. Consequently, shifts from infection with one strain to infection with another must occur abruptly, relative to other processes. Such abrupt shifts could correspond to within-host selective sweeps or, if mutant strains remain at low frequency, to rare events in which only the mutant strain is transmitted. The seminal studies [Antia et al., 2003, Iwasa et al., 2004] showed that under these conditions the probability of emergence is proportional to the frequency of these events, which they bundled together into a phenomenological “mutation rate”.

In conclusion, our cross-scale analysis identifies the mechanistic counterpart to this phenomenological “mutation rate”, which is the probability that an individual infected initially with the wild-type strain ends up transmitting at least one virion of the mutant strain (Step 3 in Fig 5). This quantity, which is approximated by the black contours in Fig 2, is governed chiefly by the ability of the mutant strain to reach an appreciable frequency within the host over the course of an infection. This is evident from the strong dependence on the strength of within-host selection—which surprisingly is much stronger than the dependence on the transmission advantage of mutant virions—and the higher values found for larger bottleneck widths, which favor transmission of low-frequency mutants through a straight-forward sampling effect. This sampling effect is consistent with the theoretical work of Geoghegan et al. [2016b], and the experimental study of Frise et al. [2016], who found larger bottlenecks increased the likelihood of mutant viral strains being transmitted between hosts. The duration of infection plays a crucial role, and our analysis showed that achieving this first transmission of the adaptive mutant is a key barrier to evolutionary emergence for short-term infections (Fig 2A,B). This finding aligns with the recent observation that putative immune-escape mutants of pandemic H1N1 influenza, which should have a within-host fitness advantage, were generated readily in infected humans but did not reach high within-host frequency and have been detected very rarely at the consensus level (i.e. they have failed to emerge) [Dinis et al., 2016]. While more investigation is needed to determine the relevant  $s$  and  $\tau$  parameters for these strains, these data are consistent with the

mechanism we identify whereby these variants may be adaptive but have insufficient time to reach high enough frequencies to avoid being lost in transmission bottlenecks.

Our analysis highlights an additional factor, the cross-scale reproductive number  $\alpha$ , previously unrecognized in models neglecting within-host diversity and analyses centered on  $R_0$  for pure infections. Even after the mutant strain has been transmitted, it needs to increase in frequency at the scale of the infected host population (Step 4 in Fig 5). Specifically, each transmitted mutant virion, on average, needs to replace itself with more than one transmitted mutant virion in the next generation of infected hosts. When this occurs, it sets up a positive feedback along chains of infections: individuals with a higher frequency of the mutant strain tend to infect more individuals, which in turn provides more opportunities to transmit, on average, higher frequencies of the mutant strain to the next generation. Conversely, when this between-generation cross-scale reproductive number is less than one, the positive feedback leads to lower and lower frequencies of the mutant strain within the infected host population. This positive feedback mechanism is stronger for wider transmission bottlenecks ( $\geq 5$  virions in our numerical explorations), which better preserve the mutant frequency from one host to the next. Interestingly, this  $\geq 5$  virion threshold for transmission bottlenecks is consistent with the threshold eliminating fitness losses in models of RNA virus evolution in plaque to plaque transfers of diluted viral solutions on plates of susceptible cells [LeClair and Wahl, 2018].

The directionality of the positive feedback is more complex, and depends on multiple factors including the infection duration and the presence or absence of cross-scale conflicts. For long-term infections, mutant frequencies can drop deterministically within a host, and hence prevent emergence, even if the mutant strain has a reproductive number greater than one. This occurs when the mutant strain has a within-host selective disadvantage and between-host selective advantage (upper left quadrant of Fig 2D); the long infectious period allows time for the within-host disadvantage to drive the mutant strain to lower frequency and, thereby, set up the positive feedback effectively preventing evolutionary emergence. In contrast, for short-term infections the mutant strain tends to rise in frequency whenever the mutant reproductive number is greater than one, because there is insufficient time for any within-host disadvantage to act. In

particular, evolutionary emergence may occur despite within-host selective disadvantages, a possibility excluded by previous theory [Park et al., 2013]. Collectively these two results imply that, in the face of cross-scale conflict and wide transmission bottlenecks with longer infectious periods can inhibit, rather than facilitate [André and Day, 2005], evolutionary emergence (Fig 2B,D). Related to this result, Geoghegan et al. [2016b] found that longer durations of the infectious period would lower the probability that a donor would infect the recipient. In their case, this occurred because fitness of the mutant was assumed to be lower in the donor host species and higher in the recipient species. Hence, a longer infectious period could purge any mutants arising in the donor and result in the recipient only receiving wild-type virions.

Our cross-scale analysis enables us to address two long-standing and interrelated questions in emerging pathogen research, regarding the influence of transmission bottleneck size on emergence probability and the importance of “pre-adapted” mutations circulating in the animal reservoir [Parrish et al., 2008, Pepin et al., 2010, Gog et al., 2015, Woolhouse et al., 2012a, Orr and Unckless, 2014, Geoghegan et al., 2016b]. In both cases, the answer depends on the cross-scale reproductive number  $\alpha$  that governs the frequency feedback. Under most circumstances, wider bottlenecks boost the probability of emergence (Fig 4A,B), because they favor the onward transmission of mutant virions when they are rare; this is particularly vital for the first transmission of mutant virions (i.e. Step 3 in Fig. 5). The exception is for long-term infections with  $\alpha < 1$ , such that the mutant tends to decline in frequency in the infected host population. Under these circumstances, wider bottlenecks hinder emergence by propagating reductions in the frequency of the mutant strain more efficiently from host to host (Step 4 in Fig. 5). Conventional thinking about the influence of bottlenecks on viral adaptation emphasizes fitness losses due to genetic drift and the effects of Muller’s ratchet [Duarte et al., 1992, Bergstrom et al., 1999, Novella et al., 1999, McCrone and Luring, 2018, LeClair and Wahl, 2018], which become more severe for narrower bottlenecks. Contrary to these negative effects of narrow bottlenecks, our findings highlight that narrower bottlenecks can aid emergence in long-term infections with a cross-scale conflict in selection (Fig 4B). Here the adaptive gain in transmissibility at population scales can be impeded by the selective disadvantage at the

within-host scale, but, intriguingly, this disadvantage is neutralized by genetic drift arising from narrow bottlenecks. Given the evidence for cross-scale evolutionary conflicts for HIV-1 [Shaw and Hunter, 2012, Alizon and Fraser, 2013, Carlson et al., 2014, Lythgoe et al., 2017], our results suggest the possibility that HIV-1's narrow transmission bottleneck [Keele et al., 2008] could play a role in the emergence of novel strains (e.g. drug resistant strains).

Similar mechanisms dictate the influence of mutant viral strains circulating in the reservoir, particularly for long-term infections (Fig 4C,D). If the cross-scale reproductive number  $\alpha$  is greater than one, so that the mutant frequency rises easily in the infected host population, then even low frequencies of mutants in the reservoir lead to substantial risk of emergence. Indeed, for long-term infections with  $\alpha > 1$ , emergence becomes almost certain when there are mutants in the initial spillover inoculum. Conversely, when the cross-scale reproductive number is less than one, emergence probability scales with the proportion of mutants in the initial dose, and when  $\alpha \ll 1$ , the initial dose must consist almost entirely of the mutant strain in order to pose any major risk. These findings yield direct lessons for the growing enterprise of conducting genetic surveillance on zoonotic pathogens in their animal reservoirs [Russell et al., 2012, Davis et al., 2014, Watanabe et al., 2014, Carroll et al., 2018]. A crucial prerequisite for genetic surveillance is knowledge of genotypes of concern; the integration of various research approaches to address this question, and estimate key quantities, is an on-going research challenge [Russell et al., 2014, Geoghegan et al., 2016a, Lipsitch et al., 2016]. Risk to humans increases if there is any non-zero proportion of mutant viruses in the spillover inoculum, so tracking the presence of such mutants is beneficial. Surprisingly, the quantitative frequency of mutants in the initial dose has little impact on emergence probability in most scenarios, with the one exception of long-term infections with  $\alpha < 1$ . Collectively, these results suggest that any knowledge of the cross-scale reproductive number and mutant reproductive numbers can help to refine our goals for genetic surveillance, and that in many circumstances presence/absence detection is sufficient.

While there are not sufficient data from past emergence events to test our model's conclusions, recent studies combining animal transmission experiments with deep sequencing have exhibited many phenomena aligned with our findings. Moncla et al. [2016] conducted deep sequencing



analyses of H1N1 influenza viruses, in the context of ferret airborne transmission experiments that  
2 examined the adaptation of avian-like viruses to the mammalian host. Their results provide  
in-depth insights into selection within hosts and at transmission bottlenecks, for a range of  
4 mutations on genetic backgrounds that change as adaptation proceeds (i.e. equivalent to  
numerous separate implementations of our model of a single mutational step). They observe a  
6 fascinating range of dynamics: some mutations appeared to have  $\alpha$  moderately above 1, exhibiting  
modest increases in frequency between generations, but achieved this outcome with different traits  
8 (e.g. S113N on the HA190D225D background exhibited strong within-host selection and no  
evident transmission advantage, while D265V showed weak within-host selection but its frequency  
10 rises in transmission). Another mutation (I187T on the ‘Mut’ background) appeared to have  
 $\alpha \gg 1$  and exhibited strong selection at both scales; notably, this mutation is widespread in 17/17  
12 human-derived isolates of the post-emergence 1918 virus, consistent with the successful and rapid  
emergence our model would predict. Moncla et al. also present substantial evidence of cross-scale  
14 conflict in selection, as one mutation (G225D on ‘Mut’ background) exhibited declining  
frequencies within ferrets but rose to fixation in 2/2 transmission events, while numerous  
16 mutations in the HA2 region rose in frequency within the host but were eliminated in  
transmission. Another study examined a set of ‘gain-of-function’ mutations in H5N1 influenza in  
18 ferrets, and reported a slow rise in frequency when the virus was passaged between ferrets by  
intranasal inoculation, then rapid fixation of these mutations during airborne transmission [Linster  
20 et al., 2014]; the airborne transmission data are consistent with strong between-host selection and  
a high  $\alpha$  value (though we emphasize that circulating H5N1 viruses required substantial  
22 modification to the favorable genetic background used in those experiments). Intriguingly, Moncla  
et al. synthesized their results with those of earlier studies [Wilker et al., 2013, Varble et al., 2014,  
24 Zaraket et al., 2015] to hypothesize that the ‘stringency’ of the transmission bottleneck varies  
systematically during the course of viral adaptation, with loose bottlenecks prevailing when  
26 viruses first encounter a new host species (and perhaps again when the virus is host-adapted [Poon  
et al., 2016]), and much tighter bottlenecks at the key juncture in host adaptation when a  
28 genotype with greater transmissibility is available to be selected. If this hypothesis is correct, then

our findings can be applied to each adaptive step independently, and may help to identify which viral traits are most crucial to adaptive steps subject to tighter or looser bottlenecks.

Our results focus on systems where there is one major rate-limiting step to emergence, and the viral population can be represented by one wild-type and one mutant strain. This is a simplification of most viral emergence problems, but will apply directly to systems where a single large-effect mutation is the primary barrier to emergence of a supercritical strain, as for Venezuelan equine encephalitis virus emerging from rodents to horses [Anishchenko et al., 2006]. While it is possible to extend our exact computations and analysis of the cross-scale reproductive number to systems with multiple mutational steps, the present analysis already provides insights into more complex evolutionary scenarios. For evolutionary trajectories that proceed through a fixed series of genotypes, the probability of emergence can be approximated by extension of our equation (4), as in previous work [Antia et al., 2003, Iwasa et al., 2004, Park et al., 2013]. If emergence requires multiple mutational steps which pass through a fitness valley, then the scale at which this valley occurs matters. A within-host fitness valley in replication rates would hinder pathogens with long-term infections and larger bottleneck widths, more than those with smaller bottlenecks. A between-host fitness valley in transmissibility could hinder evolutionary emergence of pathogens causing long-term infections more than those causing short-term infections, unless the within-host landscape is sufficiently favorable to allow traversing the valley within a single host's long-term infection. Recent studies have also highlighted the importance of considering the broader genotype space, which can reveal indirect paths that circumvent fitness valleys [Wu et al., 2016], alternative genotypes that yield similar phenotypes [Moncla et al., 2016], and the costs imposed by deleterious mutants on higher mutation rates [Loverdo and Lloyd-Smith, 2013].

Our analysis also focuses on a simple “logistic-like” model for within-host viral dynamics. This simplification allows us to study how evolutionary emergence is limited by different factors for pathogens dominated by exponential versus saturated phases of viral growth, while maintaining analytical tractability. Future important extensions would be to allow within-host fitness to alter the carrying capacity in the saturated phase, as well as identifying the relative contributions of stochastic within-host dynamics [Geoghegan et al., 2016b], immune responses, and host

heterogeneity on viral emergence. We have assumed that the bottleneck width  $N$  is fixed for a  
2 given pathogen. This is broadly consistent with currently available data [Keele et al., 2008, Wang  
et al., 2010, Bull et al., 2011], but it will be important to explore the consequences of variation in  
4 bottleneck width arising from different routes of transmission, or possibly from changing viral  
loads [Zwart and Elena, 2015, McCrone and Lauring, 2018]. The computational and analytical  
6 framework developed here can be extended to account for these additional complexities. Other  
important extensions can explore the impact of clonal competition on emergence  
8 probabilities [Strelkova and Lässig, 2012, Gerrish and Lenski, 1998, Good et al., 2012,  
Ogbunugafor and Eppstein, 2017] or the potential for complementation to rescue pathogen strains  
10 from deep fitness valleys—a mechanism that depends on wide transmission bottlenecks [Ke et al.,  
2013].

12 Our cross-scale analysis opens the door for a new generation of integrative risk assessment  
models for pathogen emergence, which will integrate growing streams of data collected in  
14 laboratories and field surveillance programs [Russell et al., 2014, Lipsitch et al., 2016, Carroll  
et al., 2018]. At present we rely on the intuition of individual scientists to link together the  
16 discoveries from targeted experiments, massively parallel phenotypic screens, experimental  
evolution, clinical medicine, and field epidemiology and disease ecology. Mathematical and  
18 computational models that connect biological scales using mechanistic principles can make unique  
contributions to this transdisciplinary enterprise, by formally integrating diverse empirical findings  
20 and by identifying the crucial knowledge gaps to focus future research. The work presented here is  
a step on the path to realizing this potential.

22 Acknowledgements. This work was supported by U.S. National Science Foundation Grants  
EF-0928987 and DMS-1313418 to SJS, and EF-0928690 and DEB-1557022 to JLS.

24

## REFERENCES

26 S. Alizon and C. Fraser. Within-host and between-host evolutionary rates across the HIV-1  
genome. *Retrovirology*, 10, 2013.

- J.B. André and T. Day. The effect of disease life history on the evolutionary emergence of novel pathogens. *Proceedings of the Royal Society B: Biological Sciences*, 272:1949–1956, 2005.
- M. Anishchenko, R. A. Bowen, S. Paessler, L. Austgen, I. P. Greene, and S. C. Weaver. Venezuelan encephalitis emergence mediated by a phylogenetically predicted viral mutation. *Proceedings of the National Academy of Sciences of the United States of America*, 103: 4994–4999, 2006. doi: 10.1073/pnas.0509961103.
- R. Antia, R.R. Regoes, J.C. Koella, and C.T. Bergstrom. The role of evolution in the emergence of infectious diseases. *Nature*, 426:658–661, 2003.
- K. B. Athreya and P. E. Ney. *Branching processes*. Dover Publications Inc., Mineola, NY, 2004.
- C. T. Bergstrom, P. McElhany, and L. A. Real. Transmission bottlenecks as determinants of virulence in rapidly evolving pathogens. *Proceedings of the National Academy of Sciences*, 96: 5095–5100, 1999.
- Debrah I Boeras, Peter T Hraber, Mackenzie Hurlston, Tammy Evans-Strickfaden, Tanmoy Bhattacharya, Elena E Giorgi, Joseph Mulenga, Etienne Karita, Bette T Korber, Susan Allen, et al. Role of donor genital tract hiv-1 diversity in the transmission bottleneck. *Proceedings of the National Academy of Sciences*, 108(46):E1156–E1163, 2011.
- R. A. Bull, F. Luciani, K. McElroy, S. Gaudieri, S. T. Pham, A. Chopra, B. Cameron, L. Maher, G. J. Dore, and P. A. White. Sequential bottlenecks drive viral evolution in early acute hepatitis C virus infection. *PLOS Pathogens*, 7:e1002243., 2011.
- R. A. Bull, J. S. Eden, F. Luciani, K. McElroy, W. D. Rawlinson, and P. A. White. Contribution of intra-and interhost dynamics to norovirus evolution. *Journal of Virology*, 86:3219–3229, 2012.
- J. M. Carlson, M. Schaefer, D. C. Monaco, R. Batorsky, D. T. Claiborne, J. Prince, M. J. Deymier, Z. S. Ende, N. R. Klatt, and C. E. DeZiel. Selection bias at the heterosexual HIV-1 transmission bottleneck. *Science*, 345:1254031, 2014.
- Dennis Carroll, Peter Daszak, Nathan D Wolfe, George F Gao, Carlos M Morel, Subhash Morzaria, Ariel Pablos-Méndez, Oyewale Tomori, and Jonna AK Mazet. The global virome project. *Science*, 359(6378):872–874, 2018.
- C.T. Davis, C. Chen, L. and Pappas, J. Stevens, T.M. Tumpey, L.V Gubareva, J.M. Katz, J.M. Villanueva, R.O. Donis, and N.J. Cox. Use of highly pathogenic avian influenza A (H5N1) gain-of-function studies for molecular-based surveillance and pandemic preparedness. *MBio*, 5: e02431–14, 2014.
- Marianne De Paepe and François Taddei. Viruses’ life history: towards a mechanistic basis of a trade-off between survival and reproduction among phages. *PLoS biology*, 4(7):e193, 2006.
- O. Diekmann and J.A.P. Heesterbeek. *Mathematical epidemiology of infectious diseases*, volume 146. Wiley, Chichester, 2000.
- Jorge M Dinis, Nicholas W Florek, Omolayo O Fatola, Louise H Moncla, James P Mutschler, Olivia K Charlier, Jennifer K Meece, Edward A Belongia, and Thomas C Friedrich. Deep sequencing reveals potential antigenic variants at low frequencies in influenza a virus-infected humans. *Journal of Virology*, 90:3355–3365, 2016.
- E. Domingo, J. Sheldon, and C. Perales. Viral quasispecies evolution. *Microbiology and Molecular Biology Reviews*, 76:159–216, 2012.
- E. Duarte, D. Clarke, A. Moya, E. Domingo, and J. Holland. Rapid fitness losses in mammalian RNA virus clones due to Muller’s ratchet. *Proceedings of the National Academy of Sciences*, 89: 6015–6019, 1992.
- K.J. Emmett, A. Lee, H. Khiabani, and R. Rabadan. High-resolution genomic surveillance of 2014 ebolavirus using shared subclonal variants. *PLOS Currents Outbreaks*, 1, 2015.

- Rebecca Frise, Konrad Bradley, Neeltje Van Doremalen, Monica Galiano, Ruth A Elderfield, Peter  
2 Stilwell, Jonathan W Ashcroft, Mirian Fernandez-Alonso, Shahjahan Miah, Angie Lackenby,  
et al. Contact transmission of influenza virus between ferrets imposes a looser bottleneck than  
4 respiratory droplet transmission allowing propagation of antiviral resistance. *Scientific Reports*,  
6:29793, 2016.
- 6 Alice Fusaro, Luca Tassoni, Adelaide Milani, Joseph Hughes, Annalisa Salviato, Pablo R Murcia,  
Paola Massi, Gianpiero Zamperin, Lebara Bonfanti, and Stefano Marangon. Unexpected  
8 inter-farm transmission dynamics during a highly pathogenic avian influenza epidemic. *Journal*  
*of Virology*, 90:6401–11, 2016.
- 10 Jemma L Geoghegan, Alistair M Senior, Francesca Di Giallonardo, and Edward C Holmes.  
Virological factors that increase the transmissibility of emerging human viruses. *Proceedings of*  
12 *the National Academy of Sciences*, 113:4170–4175, 2016a.
- J.L. Geoghegan, A.M. Senior, and E.C. Holmes. Pathogen population bottlenecks and adaptive  
14 landscapes: overcoming the barriers to disease emergence. *Proceedings of the Royal Society B*,  
283:20160727, 2016b.
- 16 P.J. Gerrish and R.E. Lenski. The fate of competing beneficial mutations in an asexual  
population. *Genetica*, 102:127–144, 1998.
- 18 Julia R Gog, Lorenzo Pellis, James LN Wood, Angela R McLean, Nimalan Arinaminpathy, and  
James O Lloyd-Smith. Seven challenges in modeling pathogen dynamics within-host and across  
20 scales. *Epidemics*, 10:45–48, 2015.
- B.H. Good, I.M. Rouzine, D.J. Balick, O. Hallatschek, and M.M. Desai. Distribution of fixed  
22 beneficial mutations and the rate of adaptation in asexual populations. *Proceedings of the*  
*National Academy of Sciences*, 109:4950–4955, 2012.
- 24 Christopher D Goodman, Josephine E Siregar, Vanessa Mollard, Joel Vega-Rodríguez, Din  
Syafuruddin, Hiroyuki Matsuoka, Motomichi Matsuzaki, Tomoko Toyama, Angelika Sturm, and  
26 Anton Cozijnsen. Parasites resistant to the antimalarial atovaquone fail to transmit by  
mosquitoes. *Science*, 352:349–353, 2016.
- 28 B. T. Grenfell, O. G. Pybus, J. R. Gog, J. L. N. Wood, J. M. Daly, J. A. Mumford, and E. C.  
Holmes. Unifying the epidemiological and evolutionary dynamics of pathogens. *Science*, 303:  
30 327–332, 2004.
- Andreas Handel, Justin Brown, David Stallknecht, and Pejman Rohani. A multi-scale analysis of  
32 influenza a virus fitness trade-offs due to temperature-dependent virus persistence. *PLOS*  
*Computational Biology*, 9(3):1–13, 03 2013. doi: 10.1371/journal.pcbi.1002989. URL  
34 <https://doi.org/10.1371/journal.pcbi.1002989>.
- T. E. Harris. The theory of branching processes. 2002. Corrected reprint of the 1963 original  
36 [Springer, Berlin].
- E. C. Holmes. Viral evolution in the genomic age. *PLOS Biology*, 5:2104–2105, 2007.
- 38 C.R. Howard and N.F. Fletcher. Emerging virus diseases: can we ever expect the unexpected?  
*Emerging Microbes and Infections*, 1:e46, 2012.
- 40 J. Hughes, R. C. Allen, M. Baguelin, K. Hampson, G. J. Baillie, D. Elton, J. R. Newton,  
P. Kellam, J. L. Wood, E. C. Holmes, and P. R. Murcia. Transmission of equine influenza virus  
42 during an outbreak is characterized by frequent mixed infections and loose transmission  
bottlenecks. *PLOS Pathogens*, 8:e1003081, 2012.
- 44 A. C. Hurt, S. S. Nor’e, J. M. McCaw, H. R. Fryer, J. Mosse, A. R. McLean, and I. G. Barr.  
Assessing the viral fitness of oseltamivir-resistant influenza viruses in ferrets using a  
46 competitive-mixtures model. *Journal of Virology*, 84:9427–9438, 2010.

- M. Imai, T. Watanabe, M. Hatta, S. C. Das, M. Ozawa, K. Shinya, G. Zhong, A. Hanson,  
2 H. Katsura, S. Watanabe, C. Li, E. Kawakami, S. Yamada, M. Kiso, Y. Suzuki, E. A. Maher,  
G. Neumann, and Y. Kawaoka. Experimental adaptation of an influenza H5 HA confers  
4 respiratory droplet transmission to a reassortant H5 HA/h1n1 virus in ferrets. *Nature*, 486:  
420–428, 2012.
- 6 Y. Iwasa, F. Michor, and M.A. Nowak. Evolutionary dynamics of invasion and escape. *Journal of  
Theoretical Biology*, 226:205–214, 2004.
- 8 K.E. Jones, N.G. Patel, M.A. Levy, A. Storeygard, D. Balk, J.L. Gittleman, and P. Daszak.  
Global trends in emerging infectious diseases. *Nature*, 451:990–993, 2008.
- 10 Marcel Jonges, Matthijs RA Welkers, Rienk E Jeeninga, Adam Meijer, Peter Schneeberger,  
Ron AM Fouchier, Menno D de Jong, and Marion Koopmans. Emergence of the  
12 virulence-associated pb2 e627k substitution in a fatal human case of highly pathogenic avian  
influenza virus a (h7n7) infection as determined by illumina ultra-deep sequencing. *Journal of  
14 virology*, 88(3):1694–1702, 2014. ISSN 0022-538X.
- Samuel Mundia Kariuki, Philippe Selhorst, Kevin K Ariën, and Jeffrey R Dorfman. The hiv-1  
16 transmission bottleneck. *Retrovirology*, 14(1):22, 2017.
- 18 R. Ke, J. Aaskov, E. C. Holmes, and J. O. Lloyd-Smith. Phylodynamic analysis of the emergence  
and epidemiological impact of transmissible defective dengue viruses. *PLOS Pathogens*, 9:  
e1003193, 2013.
- 20 B. F. Keele, E. E. Giorgi, J. F. Salazar-Gonzalez, J. M. Decker, K. T. Pham, M. G. Salazar,  
C. Sun, T. Grayson, S. Wang, and H. Li. Identification and characterization of transmitted and  
22 early founder virus envelopes in primary HIV-1 infection. *Proceedings of the National Academy  
of Sciences*, 105:7552–7557, 2008.
- 24 Gustavo H Kijak, Eric Sanders-Buell, Agnes-Laurence Chenine, Michael A Eller, Nilu  
Goonetilleke, Rasmi Thomas, Sivan Leviyang, Elizabeth A Harbolick, Meera Bose, Phuc Pham,  
26 et al. Rare hiv-1 transmitted/founder lineages identified by deep viral sequencing contribute to  
rapid shifts in dominant quasispecies during acute and early infection. *PLoS pathogens*, 13(7):  
28 e1006510, 2017.
- 30 T. Lam, B. Zhou, J. Wang, Y. Chai, Y. Shen, X. Chen, C. Ma, W. Hong, Y. Chen, Y. Zhang,  
L. Duan, P. Chen, J. Jiang, Yu Zhang, Lifeng Li, Leo Lit Man Poon, Richard J. Webby,  
David K. Smith, Gabriel M. Leung, Joseph S. M. Peiris, Edward C. Holmes, Yi Guan, and  
32 Huachen Zhu. Dissemination, divergence and establishment of H7N9 influenza viruses in china.  
*Nature*, 522:102–105, 2015.
- 34 J.S. LeClair and L.M. Wahl. The impact of population bottlenecks on microbial adaptation.  
*Journal of Statistical Physics*, 172:114–125, 2018.
- 36 P. Lemey, A. Rambaut, and O. G. Pybus. Hiv evolutionary dynamics within and among hosts.  
*AIDS Reviews*, 8:125–140, 2006.
- 38 Ashley Sobel Leonard, Daniel Weissman, Benjamin Greenbaum, Elodie Ghedin, and Katia Koelle.  
Transmission bottleneck size estimation from pathogen deep-sequencing data, with an  
40 application to human influenza a virus. *Journal of virology*, pages JVI–00171, 2017.
- 42 S. G. Lim, Y. Cheng, S. Guindon, B. L. Seet, L. Y. Lee, P. Hu, S. Wasser, F. J. Peter, T. Tan,  
and M. Goode. Viral quasi-species evolution during hepatitis Be antigen seroconversion.  
*Gastroenterology*, 133:951–958, 2007.
- 44 Martin Linster, Sander van Boheemen, Miranda de Graaf, Eefje JA Schrauwen, Pascal Lexmond,  
Benjamin Mänz, Theo M Bestebroer, Jan Baumann, Debby van Riel, and Guus F  
46 Rimmelzwaan. Identification, characterization, and natural selection of mutations driving

- airborne transmission of a/h5n1 virus. *Cell*, 157:329–339, 2014.
- 2 Marc Lipsitch, Wendy Barclay, Rahul Raman, Charles J Russell, Jessica A Belser, Sarah Cobey,  
Peter M Kasson, James O Lloyd-Smith, Sebastian Maurer-Stroh, Steven Riley, et al. Science  
4 forum: Viral factors in influenza pandemic risk assessment. *Elife*, 5:e18491, 2016.
- Claude Loverdo and James O Lloyd-Smith. Evolutionary invasion and escape in the presence of  
6 deleterious mutations. *PLoS ONE*, 8:e68179, 2013.
- B.V. Lowder, C.M. Guinane, N. L. Ben Zakour, L.A. Weinert, A. Conway-Morris, R.A.  
8 Cartwright, A.J. Simpson, A. Rambaut, U. Nübel, and J.R. Fitzgerald. Recent  
human-to-poultry host jump, adaptation, and pandemic spread of *Staphylococcus aureus*.  
10 *Proceedings of the National Academy of Sciences*, 106:19545–19550, 2009.
- Katrina A Lythgoe, Andy Gardner, Oliver G Pybus, and Joe Grove. Short-sighted virus evolution  
12 and a germline hypothesis for chronic viral infections. *Trends in microbiology*, 25(5):336–348,  
2017.
- 14 J.M. McCaw, N. Arinaminpathy, A.C. Hurt, J. McVernon, and A.R. McLean. A mathematical  
framework for estimating pathogen transmission fitness and inoculum size using data from a  
16 competitive mixtures animal model. *PLOS Computational Biology*, 7:e1002026, 2011.
- John T McCrone and Adam S Luring. Genetic bottlenecks in intraspecies virus transmission.  
18 *Current opinion in virology*, 28:20–25, 2018.
- John T McCrone, Robert J Woods, Emily T Martin, Ryan E Malosh, Arnold S Monto, and  
20 Adam S Luring. Stochastic processes constrain the within and between host evolution of  
influenza virus. *eLife*, 7:e35962, 2018.
- 22 N. Mideo, S. Alizon, and T. Day. Linking within-and between-host dynamics in the evolutionary  
epidemiology of infectious diseases. *Trends in ecology and evolution*, 23:511–517, 2008.
- 24 Louise H Moncla, Gongxun Zhong, Chase W Nelson, Jorge M Dinis, James Mutschler, Austin L  
Hughes, Tokiko Watanabe, Yoshihiro Kawaoka, and Thomas C Friedrich. Selective bottlenecks  
26 shape evolutionary pathways taken during mammalian adaptation of a 1918-like avian influenza  
virus. *Cell, Host, and Microbe*, 19:169–180, 2016.
- 28 M. J. Morelli, C. F. Wright, N. J. Knowles, N. Juleff, D. J. Paton, D. P. King, and D. T. Haydon.  
Evolution of foot-and-mouth disease virus intra-sample sequence diversity during serial  
30 transmission in bovine hosts. *Veterinary Research*, 44:1–15, 2013.
- S.S. Morse, J.A.K. Mazet, M. Woolhouse, C.R. Parrish, D. Carroll, W.B. Karesh,  
32 C. Zambrana-Torrel, W.I. Lipkin, and P. Daszak. Prediction and prevention of the next  
pandemic zoonosis. *The Lancet*, 380:1956–1965, 2012.
- 34 P. R. Murcia, G. J. Baillie, J. Daly, D. Elton, C. Jervis, J. A. Mumford, R. Newton, C. R. Parrish,  
K. Hoelzer, and G. Dougan. Intra-and interhost evolutionary dynamics of equine influenza  
36 virus. *Journal of Virology*, 84:6943–6954, 2010.
- P. R. Murcia, J. Hughes, P. Battista, L. Lloyd, G. J. Baillie, R. H. Ramirez-Gonzalez, D. Ormond,  
38 K. Oliver, D. Elton, and J. A. Mumford. Evolution of an Eurasian avian-like influenza virus in  
naive and vaccinated pigs. *PLOS Pathogens*, 8:e1002730, 2012.
- 40 I. S. Novella, J. Quer, E. Domingo, and J. J. Holland. Exponential fitness gains of RNA virus  
populations are limited by bottleneck effects. *Journal of Virology*, 73:1668–1671, 1999.
- 42 C Brandon Ogbunugafor and Margaret J Eppstein. Competition along trajectories governs  
adaptation rates towards antimicrobial resistance. *Nature ecology & evolution*, 1(1):0007, 2017.
- 44 H. A. Orr and R. L. Unckless. The population genetics of evolutionary rescue. *PLOS Genetics*,  
10:e1004551, 2014.

- R. J. Orton, C. F. Wright, M. J. Morelli, N. Juleff, G. Theibaud, N. J. Knowles,  
2 B. Valdazo-Gonzalez, D. J. Paton, D. P. King, and D. T. Haydon. Observing  
micro-evolutionary processes of viral populations at multiple scales. *Philosophical Transactions*  
4 *of the Royal Society B: Biological Sciences*, 368, 2013.
- M. Park, C. Loverdo, S.J. Schreiber, and J.O. Lloyd-Smith. Multiple scales of selection influence  
6 the evolutionary emergence of novel pathogens. *Philosophical Transactions of the Royal Society*  
*B: Biological Sciences*, 368:20120333, 2013.
- 8 C. R. Parrish, E. C. Holmes, D. M. Morens, E. C. Park, D. S. Burke, C. H. Calisher, C. A.  
Laughlin, L. J. Saif, and P. Daszak. Cross-species virus transmission and the emergence of new  
10 epidemic diseases. *Microbiology and Molecular Biology Reviews*, 72:457–470, 2008.
- K.M. Peck, C.H.S. Chan, and M.M. Tanaka. Connecting within-host dynamics to the rate of viral  
12 molecular evolution. *Virus Evolution*, 1:vev013, 2015.
- P. S. Pennings, S. Kryazhimskiy, and J. Wakeley. Loss and recovery of genetic diversity in  
14 adapting populations of HIV. *PLOS Genetics*, 10:e1004000, 2014.
- K. M. Pepin, S. Lass, J. R. C. Pulliam, A. F. Read, and J. O. Lloyd-Smith. Identifying genetic  
16 markers of adaptation for surveillance of viral host jumps. *Nature Reviews Microbiology*, 8:  
802–813, 2010.
- 18 L.L.M. Poon, T. Song, R. Rosenfeld, X. Lin, M.B. Rogers, B. Zhou, R. Sebra, R.A. Halpin,  
Y. Guan, and A. Twaddle. Quantifying influenza virus diversity and transmission in humans.  
20 *Nature Genetics*, 48:195–200, 2016.
- O. G. Pybus and A. Rambaut. Evolutionary analysis of the dynamics of viral infectious disease.  
22 *Nature Reviews Genetics*, 10:540–550, 2009.
- C. A. Russell, J. M. Fonville, A. E. Brown, D. F. Burke, D. L. Smith, S. L. James, S. Herfst, S. van  
24 Boheemen, M. Linster, and E. J. Schrauwen. The potential for respiratory droplet transmissible  
A/h5n1 influenza virus to evolve in a mammalian host. *Science*, 336:1541–1547, 2012.
- 26 C.A. Russell, P.M. Kason, R.O. Donis, S. Riley, J. Dunbar, A. Rambaut, J. Asher, S. Burke, C.T.  
Davis, R.J. Garten, et al. Improving pandemic influenza risk assessment. *eLife*, 3:e03883, 2014.
- 28 G. M. Shaw and E. Hunter. HIV transmission. *Cold Spring Harbor perspectives in medicine*, 2:  
a006965, 2012.
- 30 Erin M Sorrell, Hongquan Wan, Yonas Araya, Haichen Song, and Daniel R Perez. Minimal  
molecular constraints for respiratory droplet transmission of an avian–human h9n2 influenza a  
32 virus. *Proceedings of the National Academy of Sciences*, 106:7565–7570, 2009.
- J.C. Stack, P.R. Murcia, B.T. Grenfell, J.L. Wood, and E.C. Holmes. Inferring the inter-host  
34 transmission of influenza a virus using patterns of intra-host genetic variation. *Proceedings of*  
*the Royal Society B: Biological Sciences*, 2012.
- 36 J. Steel, A.C. Lowen, S. Mubareka, and Palese P. Transmission of influenza virus in a mammalian  
host is increased by pb2 amino acids 627k or 627e/701n. *PLOS Pathogens*, 5:e1000252, 2009.
- 38 N. Strelkova and M. Lässig. Clonal interference in the evolution of influenza. *Genetics*, 192:  
671–682, 2012.
- 40 Damien C Tully, Colin B Ogilvie, Rebecca E Batorsky, David J Bean, Karen A Power, Musie  
Ghebremichael, Hunter E Bedard, Adrienne D Gladden, Aaron M Seese, Molly A Amero, et al.  
42 Differences in the selection bottleneck between modes of sexual transmission influence the  
genetic composition of the hiv-1 founder virus. *PLoS pathogens*, 12(5):e1005619, 2016.
- 44 A. Varble, R. A. Albrecht, S. Backes, M. Crumiller, N. M. Bouvier, D. Sachs, and  
A. Garcia-Sastre. Influenza a virus transmission bottlenecks are defined by infection route and  
46 recipient host. *Cell, Host, and Microbe*, 16:691–700, 2014.



- 1 B. Vrancken, A. Rambaut, M. A. Suchard, A. Drummond, G. Baele, I. Derdelinckx, Van  
2 Wijngaerden, Vandamme E., A. M., Van Laethem, Lemey K., and P. The Genealogical  
Population Dynamics of HIV-1 in a Large Transmission Chain: Bridging within and among  
4 Host Evolutionary Rates. *PLoS Computational Biology*, 10:e1003505, 2014.
- 5 G. P. Wang, S. A. Sherrill-Mix, K. M. Chang, C. Quince, and F. D. Bushman. Hepatitis C virus  
6 transmission bottlenecks analyzed by deep sequencing. *Journal of Virology*, 84:6218–6228, 2010.
- 7 Brian R Wasik, Ambika Bhushan, C Brandon Ogbunugafor, and Paul E Turner. Delayed  
8 transmission selects for increased survival of vesicular stomatitis virus. *Evolution*, 69:117–125,  
2015.
- 9 Tokiko Watanabe, Gongxun Zhong, Colin A Russell, Noriko Nakajima, Masato Hatta, Anthony  
10 Hanson, Ryan McBride, David F Burke, Kenta Takahashi, and Satoshi Fukuyama. Circulating  
12 avian influenza viruses closely related to the 1918 virus have pandemic potential. *Cell, Host,  
and Microbe*, 15:692–705, 2014.
- 13 P. R. Wilker, J. M. Dinis, G. Starrett, M. Imai, M. Hatta, C. W. Nelson, D. H. O'Connor, A. L.  
Hughes, G. Neumann, and Y. Kawaoka. Selection on haemagglutinin imposes a bottleneck  
16 during mammalian transmission of reassortant H5n1 influenza viruses. *Nature Communications*,  
4, 2013.
- 17 M. Woolhouse, F. Scott, Z. Hudson, R. Howey, and M. Chase-Topping. Human. viruses: discovery  
18 and emergence. *Philosophical Transactions of the Royal Society B: Biological Sciences*, 367:  
20 2864–2871, 2012a.
- 21 M. Woolhouse, F. Scott, Z. Hudson, R. Howey, and M. Chase-Topping. Human viruses: discovery  
22 and emergence. *Philosophical Transactions of the Royal Society B: Biological Sciences*, 367:  
2864–2871, 2012b.
- 23 Nicholas C Wu, Lei Dai, C Anders Olson, James O Lloyd-Smith, and Ren Sun. Adaptation in  
24 protein fitness landscapes is facilitated by indirect paths. *eLife*, 5:e16965, 2016. doi:  
26 10.7554/eLife.16965.
- 27 Dan Xiang, Xuejuan Shen, Zhiqing Pu, David M Irwin, Ming Liao, and Yongyi Shen. Convergent  
28 evolution of human-isolated h7n9 avian influenza a viruses. *The Journal of infectious diseases*,  
217(11):1699–1707, 2018.
- 29 L. Xu, L. Bao, W. Deng, H. Zhu, F. Li, T. Chen, Q. Lv, J. Yuan, Y. Xu, Y. Li, Y. Yao, S. Gu,  
30 P. Yu, H. Chen, and C. Qin. Rapid adaptation of avian h7n9 virus in pigs. *Virology*, 452-453:  
32 231–236, 2014.
- 31 H. Zaraket, T. Baranovich, B.S. Kaplan, R. Carter, M. Song, J.C. Paulson, J.E. Rehg, J. Bahl,  
34 J.C. Crumpton, and J. Seiler. Mammalian adaptation of influenza a (h7n9) virus is limited by a  
narrow genetic bottleneck. *Nature Communications*, 6:6553, 2015.
- 35 W. Zhu and Y. Shu. Genetic tuning of avian influenza A (H7N9) virus promotes viral fitness  
36 within different species. *Microbes and Infection*, 17:118 – 122, 2015.
- 37 Mark P Zwart and Santiago F Elena. Matters of size: genetic bottlenecks in virus infection and  
38 their potential impact on evolution. *Annual Review of Virology*, 2:161–179, 2015.

## APPENDIX

2 **Derivation of the Single Strain Reproductive Numbers.** When the within-host dynamics  
only exhibit exponential growth (i.e.  $N \exp(r_i T) < K$ ) and there is a linear transmission function,  
4 the basic reproductive numbers equal

$$(A-1) \quad R_i = \beta b_i N \frac{\exp(r_i T) - 1}{r_i} \text{ for } i = w, m.$$

When the within-host dynamics saturate (i.e.  $N \exp(r_i T) > K$ ), the basic reproductive number  
6 equals

$$(A-2) \quad R_i = \beta b_i \left( \frac{K - N}{r_i} + K T_s \right)$$

where  $T_e = \log(K/N)/r_i$  is the length of exponential phase and  $T_s = T - T_e$  is the length of  
8 saturated phase.

We derive two approximations of  $R_i$  under the assumption that  $s$  is small,  $\exp(r_i T) \gg 1$ , and  
10  $K \gg N$ . First, assume that the infection is short-term in which case  $T_e = T$ . Then provided  $s$  is  
sufficiently small to ensure that the mutant type doesn't saturate,  $R_i$  are given by (A-1). The log  
12 ratio, provided  $\exp(r_i T) \gg 1$ , satisfies

$$\begin{aligned} \log \frac{R_m}{R_w} &\approx \log \frac{\beta b_m N \exp((r_w + s)T)/(r_w + s)}{\beta b_w N \exp(r_w T)/r_w} \\ &= \tau + sT + \log \frac{r_w}{r_w + s} \\ &\approx \tau + s(T - 1/r_w) \end{aligned}$$

which yields (2) in the main text.

14 Now assume that the infection is long-term in which case  $T_e < T$ , and that if  $s < 0$ ,  $|s|$  is  
sufficiently small to ensure that the mutant type also saturates before time  $T$ . Then the basic

reproductive numbers  $R_i$  are given by (A-2). If  $K \gg N$ , then

$$\begin{aligned} \log \frac{R_m}{R_w} &\approx \log \frac{\beta b_m K \left( \frac{1}{r_w+s} + T - \frac{1}{r_w+s} \log \frac{K}{N} \right)}{\beta b_w K \left( \frac{1}{r_w} + T_s \right)} \\ &= \tau + \log \frac{\frac{r_w}{r_w+s} + T r_w - \frac{r_w}{r_w+s} \log \frac{K}{N}}{1 + r_w T_s}. \end{aligned}$$

2 Assume that  $|s| \ll r_w$ . Then

$$\log \frac{R_m}{R_w} \approx \tau + \log \frac{1 - \frac{s}{r_w} + T r_w - \left(1 - \frac{s}{r_w}\right) \log \frac{K}{N}}{1 + r_w T_s}.$$

As  $T = T_s + T_e$  and

$$\left(1 - \frac{s}{r_w}\right) \log \frac{K}{N} = \frac{r_w - s}{r_w} \log \frac{K}{N} = (r_w - s) T_e,$$

4 it follows that

$$\log \frac{R_m}{R_w} \approx \tau + \log \left( 1 + \frac{s}{r_w} \frac{r_w T_e - 1}{1 + r_w T_s} \right).$$

As  $\log(1+x) \approx x$  for small  $x$  and  $|s| \ll r_w$  by assumption, we obtain

$$\log \frac{R_m}{R_w} \approx \tau + \frac{s}{r_w} \frac{r_w T_e - 1}{r_w T_s + 1}.$$

6 Equation (3) in the main text follows in the case that  $T_s \gg T_e$  in which case the second term is approximately zero.

8 **Derivation of the Emergence Probability Approximation.** For small mutation likelihood  $\mu$ , we derive a mathematically explicit version of the approximation (4) for the emergence probability from the main text. As stated in the main text, this approximation is given by the product of three terms: the expected number of secondary, wild-type cases produced during a fade-out, the mean number of individuals infected with mutant virions by an individual initially infected only with the wild-type, and the probability of emergence from an individual infected with a single mutant virion. As noted in the main text, the first term is given by  $\frac{1}{1-R_w}$ . The second term requires more work. To derive an analytic approximation for this term, notice that the mean number of individuals infected with  $\ell$  mutant virions by an individual only infected with

the wild type equals

$$\int_0^T \beta p(v_w(t)b_w + v_m(t)b_m) \psi((v_w(t), v_m(t)), (N - \ell, \ell)) dt$$

- 2 where  $v_w(t), v_m(t)$  is the solution of the within host viral dynamics with  $v_w(0) = N, v_m(0) = 0$ ,  
 and  $\psi((v_w, v_m), (\tilde{v}_w, \tilde{v}_m))$  is the probability of an individual with viral load  $(v_w, v_m)$  infecting an  
 4 individual with a viral load of  $(\tilde{v}_w, \tilde{v}_m)$  where  $\tilde{v}_w + \tilde{v}_m = N$ . The solution  $(v_w(t), v_m(t))$  is given by

$$v_i(t) = V_i(t) \text{ if } V_w(t) + V_m(t) \leq K \text{ and } K \frac{V_i(t)}{V_w(t) + V_m(t)} \text{ otherwise}$$

where  $V_w(t), V_m(t)$  are the solutions to

$$\begin{aligned} \frac{dV_w}{dt} &= r_w(1 - \mu)V_w + r_m\mu V_m & V_w(0) &= N \\ \frac{dV_m}{dt} &= r_m(1 - \mu)V_m + r_w\mu V_w & V_m(0) &= 0. \end{aligned}$$

- 6 Ignoring back mutations (i.e. setting  $r_m\mu = 0$  and  $r_m(1 - \mu)$  to  $r_m$ ), the solutions for  $V_w(t), V_m(t)$   
 are approximately

$$\begin{aligned} V_w(t) &\approx N \exp(r_w t) \\ V_m(t) &\approx \mu N \frac{r_w}{r_w - r_m} (\exp(r_w t) - \exp(r_m t)) \end{aligned}$$

- 8 if  $r_w \neq r_m$ , and

$$V_m(t) \approx \mu N r_w t \exp(r_w t)$$

if  $r_w = r_m = r$ . Since  $\frac{x}{a+x} \approx x/a$  to first order near 0, the weighted frequency,  $x_m(t)$ , of mutant

- 10 strain is approximately

$$x_m(t) = \frac{b_m V_m(t)}{b_w V_w(t) + b_m V_m(t)} \approx \exp(\tau) \mu r_w \frac{\exp(st) - 1}{s} \text{ where } s = r_m - r_w \text{ and } \frac{b_m}{b_w} = \exp(\tau)$$

if  $s \neq 0$ , and

$$x_m(t) \approx \mu r_w t \exp(\tau)$$

- 12 if  $s = 0$ . We have

$$\psi((v_w(t), v_m(t)), (N - \ell, \ell)) = \frac{N!}{\ell!(N - \ell)!} x_w(t)^{N - \ell} x_m(t)^\ell.$$

For  $\ell \geq 2$ , these terms are of order  $\mu^2$  and therefore will be ignored. Hence, the only term of

2 interest is  $\ell = 1$ :

$$\psi((v_w(t), v_m(t)), (N - 1, 1)) \approx \mu N r_w \exp(\tau) \frac{\exp(st) - 1}{s} \text{ if } s \neq 0 \text{ and } \mu N r_w t \exp(\tau) \text{ otherwise}$$

We also can approximate (assuming  $p$  is differentiable)

$$p(b_w V_w(t) + b_m V_m(t)) \approx p(b_w V_w(t)) + O(\mu) = p(b_w \min\{K, N \exp(r_w t)\}) + O(\mu)$$

4 We drop the  $O(\mu)$  term as it will only lead to higher order terms in the approximation.

Putting all of this together gives the following approximation for the mutant force of infection

$$(A-3) \quad \beta \int_0^T \mu p(b_w \min\{K, N \exp(r_w t)\}) N r_w \exp(\tau) \frac{\exp(st) - 1}{s} dt$$

6 if  $s \neq 0$ , and

$$(A-4) \quad \beta \int_0^T \mu p(b_w \min\{K, N \exp(r_w t)\}) N r_w \exp(\tau) t dt$$

if  $s = 0$ .

8 In the case of a linear transmission function  $p(x) = x$ , we can write down explicit expressions  
for (A-3) and (A-4). There are two cases to consider. First suppose that  $N \exp(r_w T) \leq K$  i.e. the  
10 infection is short-term. Then, integrating and simplifying yields the following approximation for  
the mutant force of infection

$$\beta \mu N^2 b_w \frac{r_w}{s} \exp(\tau) \left( \frac{\exp((r_w + s)T) - 1}{r_w + s} - \frac{(\exp(r_w T) - 1)}{r_w} \right).$$

12 Assuming  $r_w \gg s$  (and thus  $r_w/(r_w + s) \simeq 1 - s/r_w$ ),

$$(A-5) \quad \beta \mu N^2 b_w \exp(\tau) \left( \underbrace{\frac{\exp(sT) - 1}{s}}_{\approx \text{(for small } s) (1+sT/2)T} \exp(r_w T) - \frac{\exp((r_w + s)T) - 1}{r_w} \right)$$

if  $s \neq 0$  and

$$\beta\mu N^2 b_w \exp(\tau) \left( T \exp(r_w T) - \frac{\exp(r_w T) - 1}{r_w} \right)$$

2 if  $s = 0$ . Now rather than writing out the entire expression for the case  $N \exp(r_w T) \geq K$ , lets  
 write down things for when the time in the saturated phase is much, much longer than the time in  
 4 the exponential phase. Then, integrating and simplifying yields the following approximation for  
 the mutant force of infection

$$(A-6) \quad \beta\mu N K b_w r_w \exp(\tau) \underbrace{\left( \frac{\exp(sT) - 1}{s} - T \right)}_{\approx (\text{small } s) (1+sT/3)T^2/2} / s$$

6 if  $s \neq 0$ , and

$$\beta\mu N K b_w r_w \exp(\tau) T^2 / 2$$

otherwise.

8 Putting this all together, (4) for an short-term (respectively long-term) infection with  $s \neq 0$   
 becomes the product of  $\frac{1}{1-R_w}$ , (A-5) (respectively (A-6)), and the probability of an outbreak  
 10 starting with one individual infected with  $N - 1$  wild type virions and 1 mutant type virions. The  
 final probability term can be calculated exactly using the generating functions described in the  
 12 *Models and Methods* section of the main text. Fig Appendix-6 illustrates the effectiveness of this  
 approximation, and Fig Appendix-7 plots the the error in the approximation.

14 **Derivation of the Mean Field Frequency Dynamics.** To understand how the viral  
 composition of infected individuals change across generations, we derive a mean field  
 16 approximation for the dynamics of the mean mutant viral load at the beginning of each generation  
 of disease spread. To this end, we define a map from  $h : [0, 1] \rightarrow [0, 1]$  where  $x \in [0, 1]$  represents  
 18 the current mean mutant viral load in the population at the beginning of the infectious period and  
 $h(x)$  is the mean at the beginning of infectious period in the next generation. Our derivation of  
 20 this mean field dynamic is done in the limit of large  $N \uparrow \infty$  and  $\mu \downarrow 0$ . None-the-less, as shown by  
 the dashed red line in Fig 2D, this approximation works quite well away from this limit.

We begin by approximating the mean initial mutant viral count in individuals infected by an individual with  $V_w(0) = N - \ell$  and  $V_m(0) = \ell$ . Recall, the force of infection for producing individuals initially infected with  $j$  mutant viral particles is given by

$$F((N - \ell, \ell), (N - j, j)) = \beta \int_0^T p\left(\sum_i b_i v_i(t)\right) \frac{N!}{(N - j)! j!} y(t)^j (1 - y(t))^{N - j} dt$$

where  $y(t) = \frac{b_m v_m(t)}{b_w v_w(t) + b_m v_m(t)}$  is the within-host frequency of the mutant strain, and  $(v_w(t), v_m(t))$  is the solution of the within-host viral dynamics with initial condition  $v_w(0) = N - \ell$ ,  $v_m(0) = \ell$ .

Weighting this term by  $j$  and summing over  $j$  yields the expected number of mutant viral particles in an individual infected by our type  $(N - \ell, \ell)$  infected individual:

$$\beta \int_0^T p\left(\sum_i b_i v_i(t)\right) \sum_j j \frac{N!}{(N - j)! j!} y(t)^j (1 - y(t))^{N - j} dt = \beta \int_0^T p\left(\sum_i b_i v_i(t)\right) N y(t) dt$$

Now if we let  $x = \ell/N$  denote the initial fraction, then dividing the previous integral by the net number of viral particles infecting new individuals yields our desired update rule

$$(A-7) \quad h(x) := \frac{\beta \int_0^T p\left(\sum_i b_i v_i(t)\right) N y(t) dt}{\beta \int_0^T p\left(\sum_i b_i v_i(t)\right) N dt} = \frac{\int_0^T p\left(\sum_i b_i v_i(t)\right) y(t) dt}{\int_0^T p\left(\sum_i b_i v_i(t)\right) dt}$$

Note that  $h(x)$  is a function of  $x$  as the solution of  $(V_w(t), V_m(t))$  depends on its initial condition  $V_w(0) = (1 - x)N$ ,  $V_m(0) = xN$ .

The points  $x = 0$  and  $x = 1$  are fixed points for  $h$  corresponding to a mutant-free and wild-type-free states. Stability of the fixed point  $x = 0$  is determined by

$$\begin{aligned} h'(0) &= \frac{\int_0^T \frac{\partial}{\partial x} p\left(\sum_i b_i v_i(t)\right) y(t) dt \int_0^T p\left(\sum_i b_i v_i(t)\right) dt \Big|_{x=0}}{\left(\int_0^T p\left(\sum_i b_i v_i(t)\right) dt\right)^2 \Big|_{x=0}} \\ &\quad - \frac{\int_0^T p\left(\sum_i b_i v_i(t)\right) dt \int_0^T p\left(\sum_i b_i v_i(t)\right) y(t) dt \Big|_{x=0}}{\left(\int_0^T p\left(\sum_i b_i v_i(t)\right) dt\right)^2 \Big|_{x=0}} \\ &= \frac{\beta \int_0^T \frac{\partial}{\partial x} p\left(\sum_i b_i v_i(t)\right) y(t) dt \Big|_{x=0}}{\beta \int_0^T p(b_w v_w(t)) dt} \approx \frac{\beta \int_0^T p\left(\sum_i b_i v_i(t)\right) y(t) dt \Big|_{x=1/N}}{\beta \int_0^T p(b_w v_w(t)) dt} \end{aligned}$$

for  $N \gg 1$ .  $h'(0)$  corresponds to  $\alpha$  described in the main text and the final expression has the verbal interpretation given in the main text.

In the special case of a linear transmission function,  $p(x) = x$ , we get the simplified expression

$$(A-8) \quad h(x) = \frac{\int_0^T b_m v_m(t) dt}{\int_0^T \sum_i b_i v_i(t) dt}$$

where

$$v_w(t) = N(1-x)e^{r_w t} \text{ if } v_w(t) + v_m(t) \leq K, \text{ otherwise } K \frac{(1-x)e^{r_w t}}{(1-x)e^{r_w t} + xe^{r_m t}}$$

$$v_m(t) = Nx e^{r_m t} \text{ if } v_w(t) + v_m(t) \leq K, \text{ otherwise } K \frac{xe^{r_m t}}{(1-x)e^{r_w t} + xe^{r_m t}}$$

Carrying out the integration, in general, is complicated by the fact that the time at which  $V_w(t) + V_m(t) = K$  has no explicit formula when  $s \neq 0$  and, in general, this saturation time will depend on  $x$ .

In the special case of short-term infections (i.e. there is only exponential growth), we get

$$h(x) = \frac{\eta x}{(\eta - 1)x + 1}$$

where

$$\eta = \exp(\tau) \frac{r_w}{\exp(r_w T) - 1} \frac{\exp(r_m T) - 1}{r_m} = \frac{R_m}{R_w}$$

$\alpha$  is defined as  $h'(0)$ , which here is equal to  $\eta$ , thus for short-term infections,  $\alpha = R_m/R_w$ .

Since  $R_w < 1$  by assumption and  $R_m > 1$  is necessary for emergence, we always have  $\alpha > 1$  and so the frequency dependent dynamics at the scale of the host population can not significantly impede emergence.

Now, let's consider the more difficult case of a long-term infection with a saturated phase to the within-host viral dynamics. Then

$$h'(0) = b_m \frac{\int_0^T \left. \frac{\partial v_m(t)}{\partial x} \right|_{x=0} dt}{\int_0^T \left. b_w v_w(t) \right|_{x=0} dt}.$$



Appendix-8  
 For  $x$  close to 0, we have the time at which the dynamics saturate,  $T_e$ , is given approximately by

$$T_e \approx \frac{1}{r_w} \log \frac{K}{N}$$

2 in which case

$$\left. \frac{\partial v_m(t)}{\partial x} \right|_{x=0} \approx \begin{cases} N \exp(r_m t) & \text{for } t \leq T_e \\ K \exp(st) & \text{else.} \end{cases}$$

Let  $T_s = T - T_e$  and assume that  $T \gg T_e, \tilde{T}_e$  where  $\tilde{T}_e$  is the length of the exponential phase for  
 4 an individual infected only with the mutant strain. Then

$$\begin{aligned} \alpha = h'(0) &\approx e^\tau \frac{0 + K \frac{\exp(sT) - 1}{s}}{0 + KT} = e^\tau \frac{\exp(sT) - 1}{sT} \\ &\approx e^\tau (1 + sT/2) \end{aligned}$$

as claimed in the main text.

6 **Estimating the Probability of Emergence when  $\alpha < 1$ .** When  $\alpha$  is less than 1, the  
 frequency of mutant virus decrease in an infected host, and consequently, even if the adapted virus  
 8 may emerge, the probability of emergence is very low, and even lower when the bottleneck size,  $N$ ,  
 increases. Here, we provide an approximation for the emergence probability when  $\alpha < 1$ , which  
 10 explains why the probability of emergence decreases dramatically when  $N$  increases.

When the outbreak starts, the first individual is infected with wild-type only. When  $s < 0$ , the  
 12 mutation-selection balance can be reached relatively quickly, and for  $s$  negative enough, the  
 proportion of mutant is small. So the probability to transmit at least one mutant is roughly equal  
 14 to the probability to transmit one mutant, which is  $N \exp(\tau) r_w \mu / |s|$  where  $r_w \mu / |s|$  is the  
 proportion of the mutant type, and  $\exp(\tau)$  is its relative transmissibility. Then, if  $s$  is small  
 16 enough, then the reproductive number of an individual with a mixed transmission is close to  $R_w$   
 of the wild-type. Thus, the number of transmissions in a wild-type outbreak can be used  
 18 ( $R_w / (1 - R_w)$ ). For an individual infected with a mixed infection, what will lead to emergence are  
 the contacts for which only the mutant is transmitted. The number of such contacts is:

$$(A-9) \quad \beta \int_0^T (b_w V_w + b_m V_m) \frac{(b_m V_m)^N}{(b_w V_w + b_m V_m)^N} dt.$$

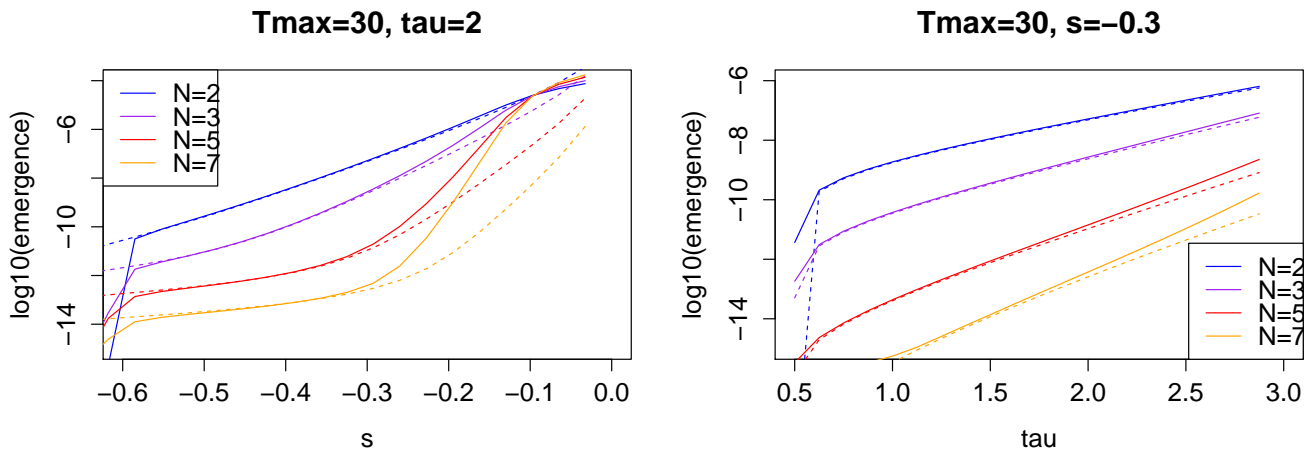

FIGURE APPENDIX-1. Approximation (A-12) (dashed lines) vs. numerical resolution of the generating maps (R code) (solid lines)

This can be re-written as:

$$(A-10) \quad \beta \int_0^T b_w V_w \frac{(\exp(\tau) V_m / V_w)^N}{(1 + \exp(\tau) V_m / V_w)^{N-1}} dt.$$

- 2 As most cases of mixed infection will be cases started with a mix of one mutant and  $N - 1$  wild-type viral particles,  $V_m / V_w = \exp(st) / (N - 1)$ . Thus previous expression is equal to:

$$(A-11) \quad \beta \int_0^T b_w \min\{K, (N - 1) \exp(r_w t)\} \frac{(\exp(\tau + st) / (N - 1))^N}{(1 + \exp(\tau + st) / (N - 1))^{N-1}} dt.$$

Last, an individual infected with mutant viruses alone has to lead to a successful outbreak, which happens at approximately the same probability than in the case with no back mutations, with probability  $p_m$ . So overall, the approximation will be:

$$(A-12) \quad p_{emergence} = \frac{R_w}{1 - R_w} \frac{\mu \exp(\tau) r_w}{-s} p_m \beta b_w \frac{N}{N - 1} \times \int_0^T \min\{K, (N - 1) \exp(r_w t)\} \underbrace{\exp(\tau + st) \left( \frac{\exp(\tau + st) / (N - 1)}{1 + \exp(\tau + st) / (N - 1)} \right)^{N-1}}_{=: f(t, N)} dt.$$

Now we can ask, which parts of this expression depend on  $N$ ? The mutant reproductive number  $R_w = b_w \int_0^T \min\{K, N \exp(r_w t)\} dt$  is independent from  $N$ , because we have chosen  $b_w$  to keep  $R_w$  the same for all  $N$  values. Thus  $b_w N / (N - 1) \int_0^T \min\{K, (N - 1) \exp(r_w t)\} dt$  is almost independent from  $N$ . Therefore, most of the dependence of  $b_w N / (N - 1) \int_0^T \min\{K, (N - 1) \exp(r_w t)\} f(t, N) dt$  with  $N$  stems from the dependence of  $f(t, N)$  with  $N$ . Since  $a \mapsto a / (1 + a)$  is an increasing function bounded above by 1 for positive  $a$ , the expression

$$\exp(\tau + st) / (N - 1) / (1 + \exp(\tau + st) / (N - 1))$$

decreases when  $N$  increases. As  $N \mapsto (a / (1 + a))^{N-1}$  is a decreasing function of  $N \geq 1$  for  $a > 0$ , we get that the probability of emergence decreases at least exponentially with the bottleneck size, as claimed in the main text. Fig [Appendix-1](#) illustrates that these approximations work especially when  $s$  is sufficiently negative.

## NUMERICS WITH NONLINEAR TRANSMISSION FUNCTIONS

To explore the robustness of our numerical results to the assumption of a linear transmission function, we redid our numerical analysis with two non-linear transmission functions  $p(x) = 1 - \exp(-x)$  in Fig [Appendix-2](#) and  $p(x) = \log(1 + x)$  in Fig [Appendix-4](#). Differences between the emergence probabilities for the nonlinear and linear transmission functions are shown in Figs [Appendix-3](#) through 4. As these figures demonstrate, we nearly get the same results.

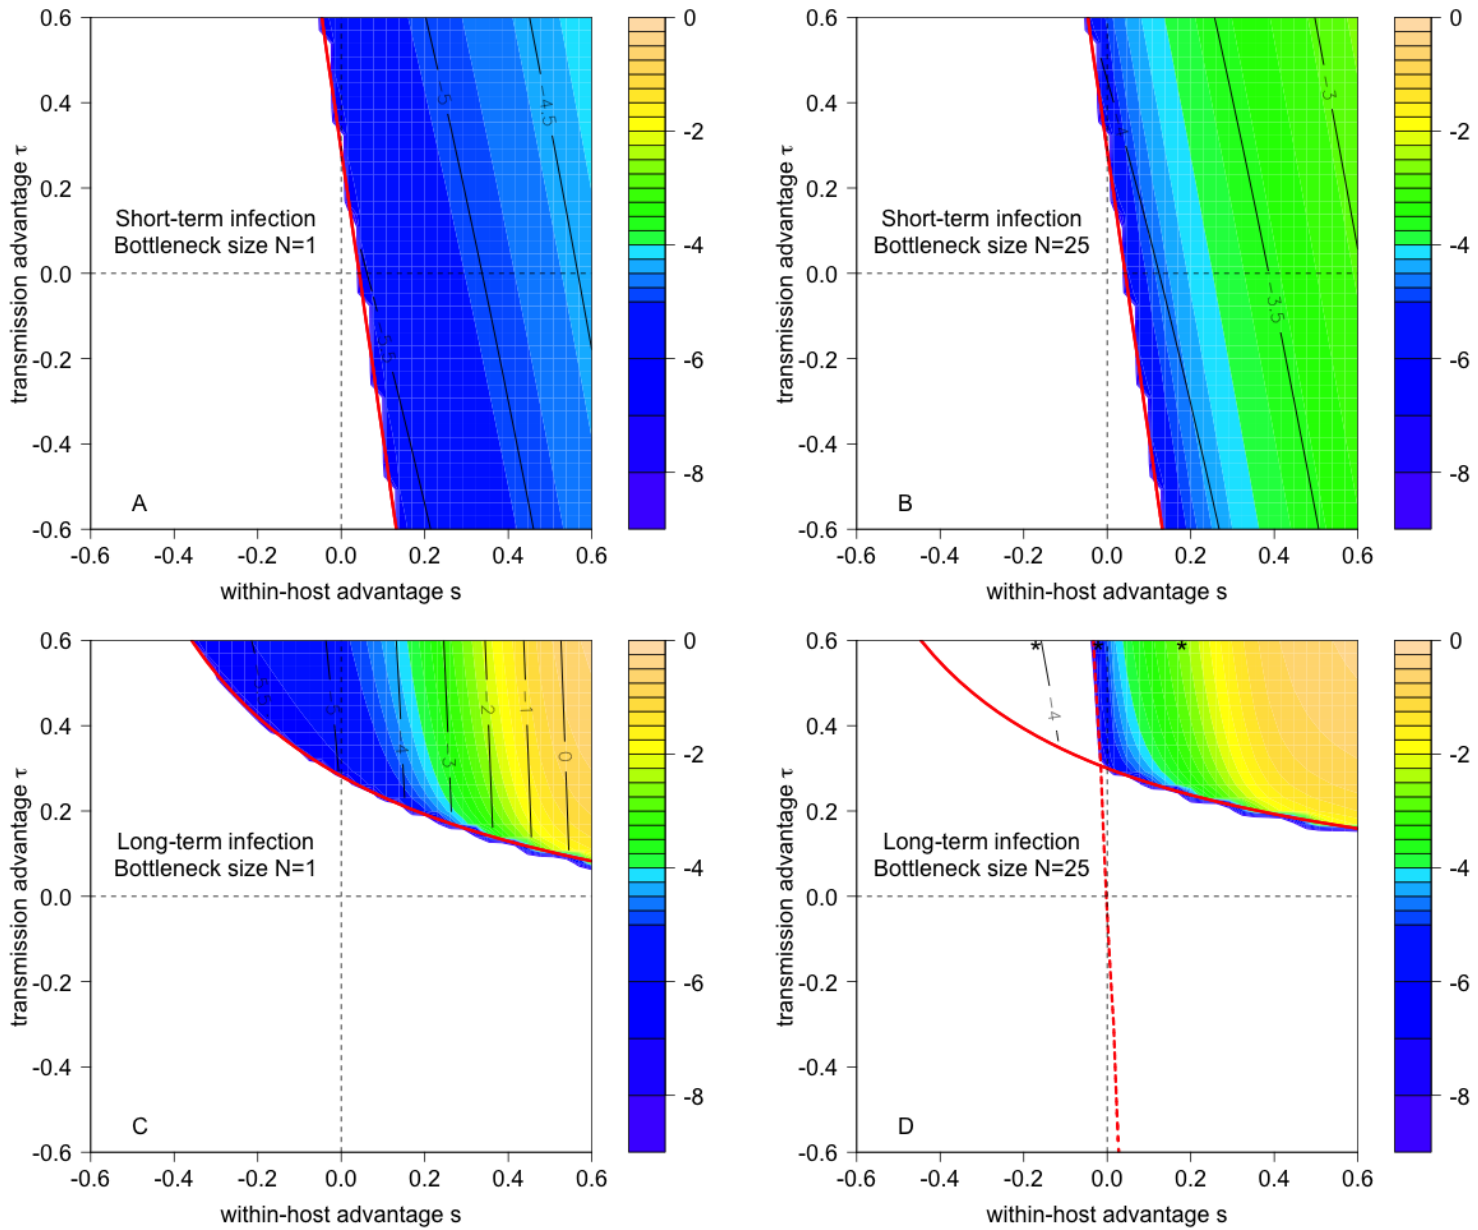

FIGURE APPENDIX-2. Emergence probabilities for the transmission function  $p(x) = 1 - \exp(-x)$  with all other parameters as indicated in Fig 2.

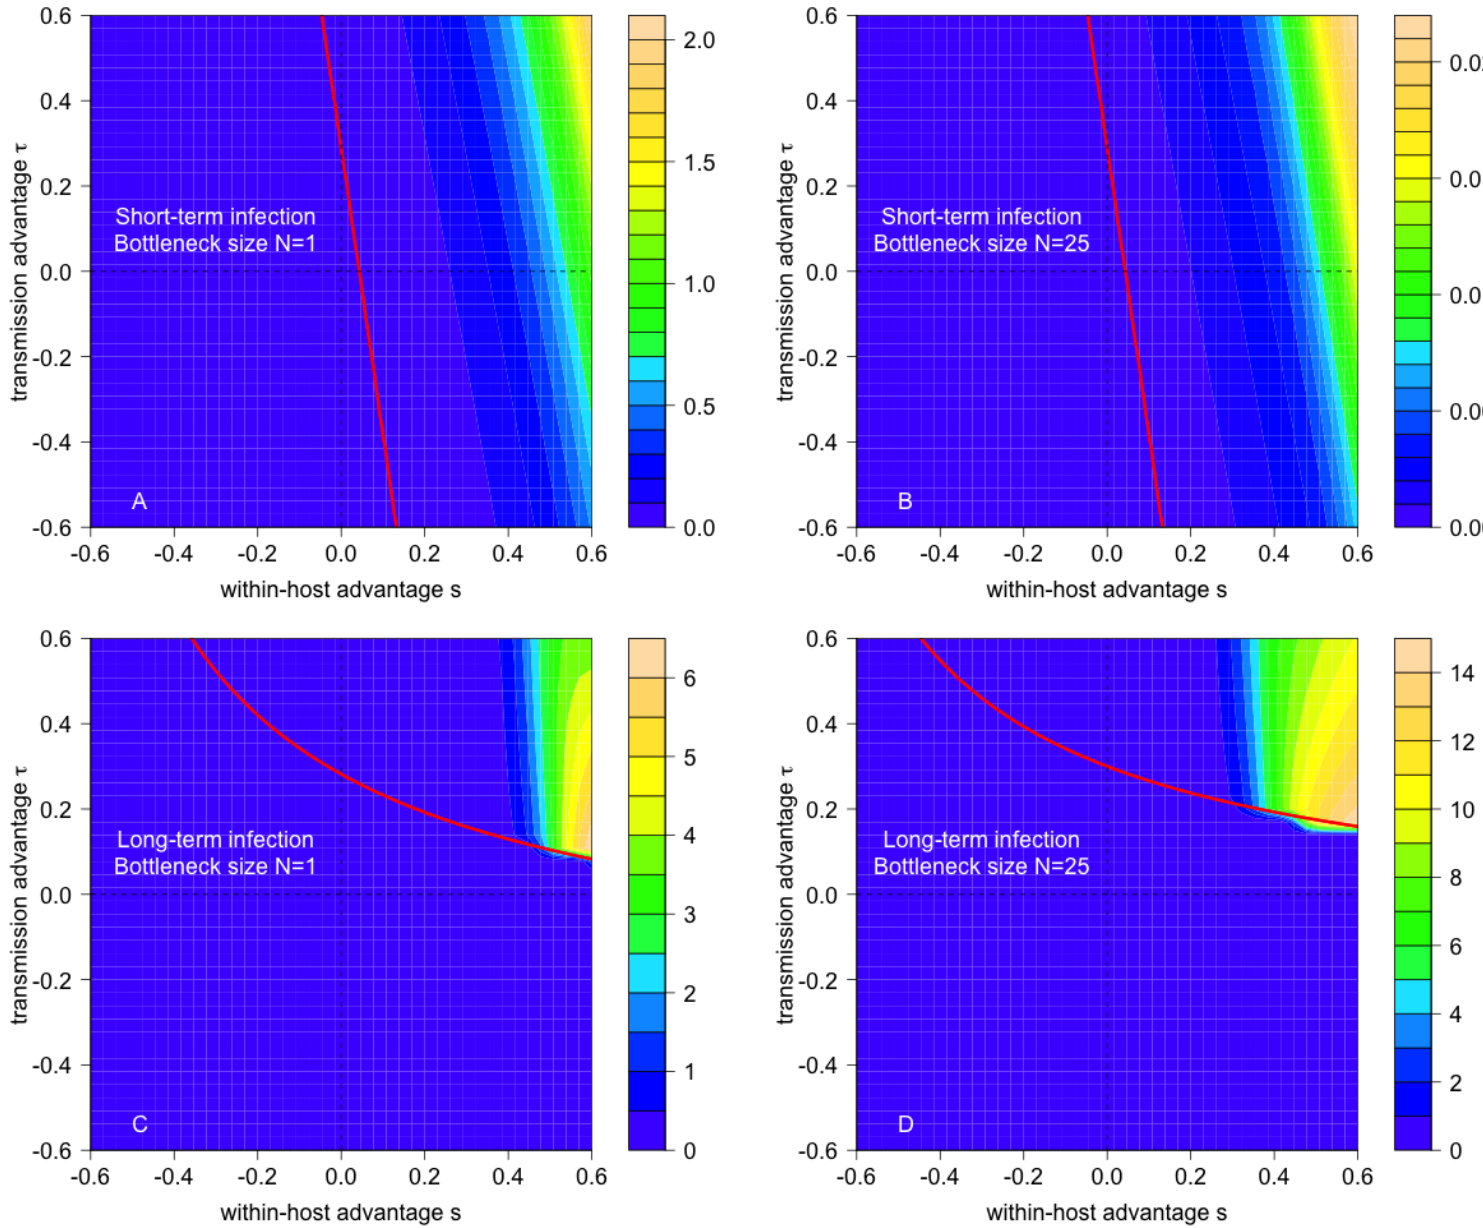

FIGURE APPENDIX-3. Contour plots of  $1,000 \times$  the absolute value of the difference between the emergence probabilities for the transmission functions  $p(x) = 1 - \exp(-x)$  and  $p(x) = x$ . Parameters as indicated in Fig 2.

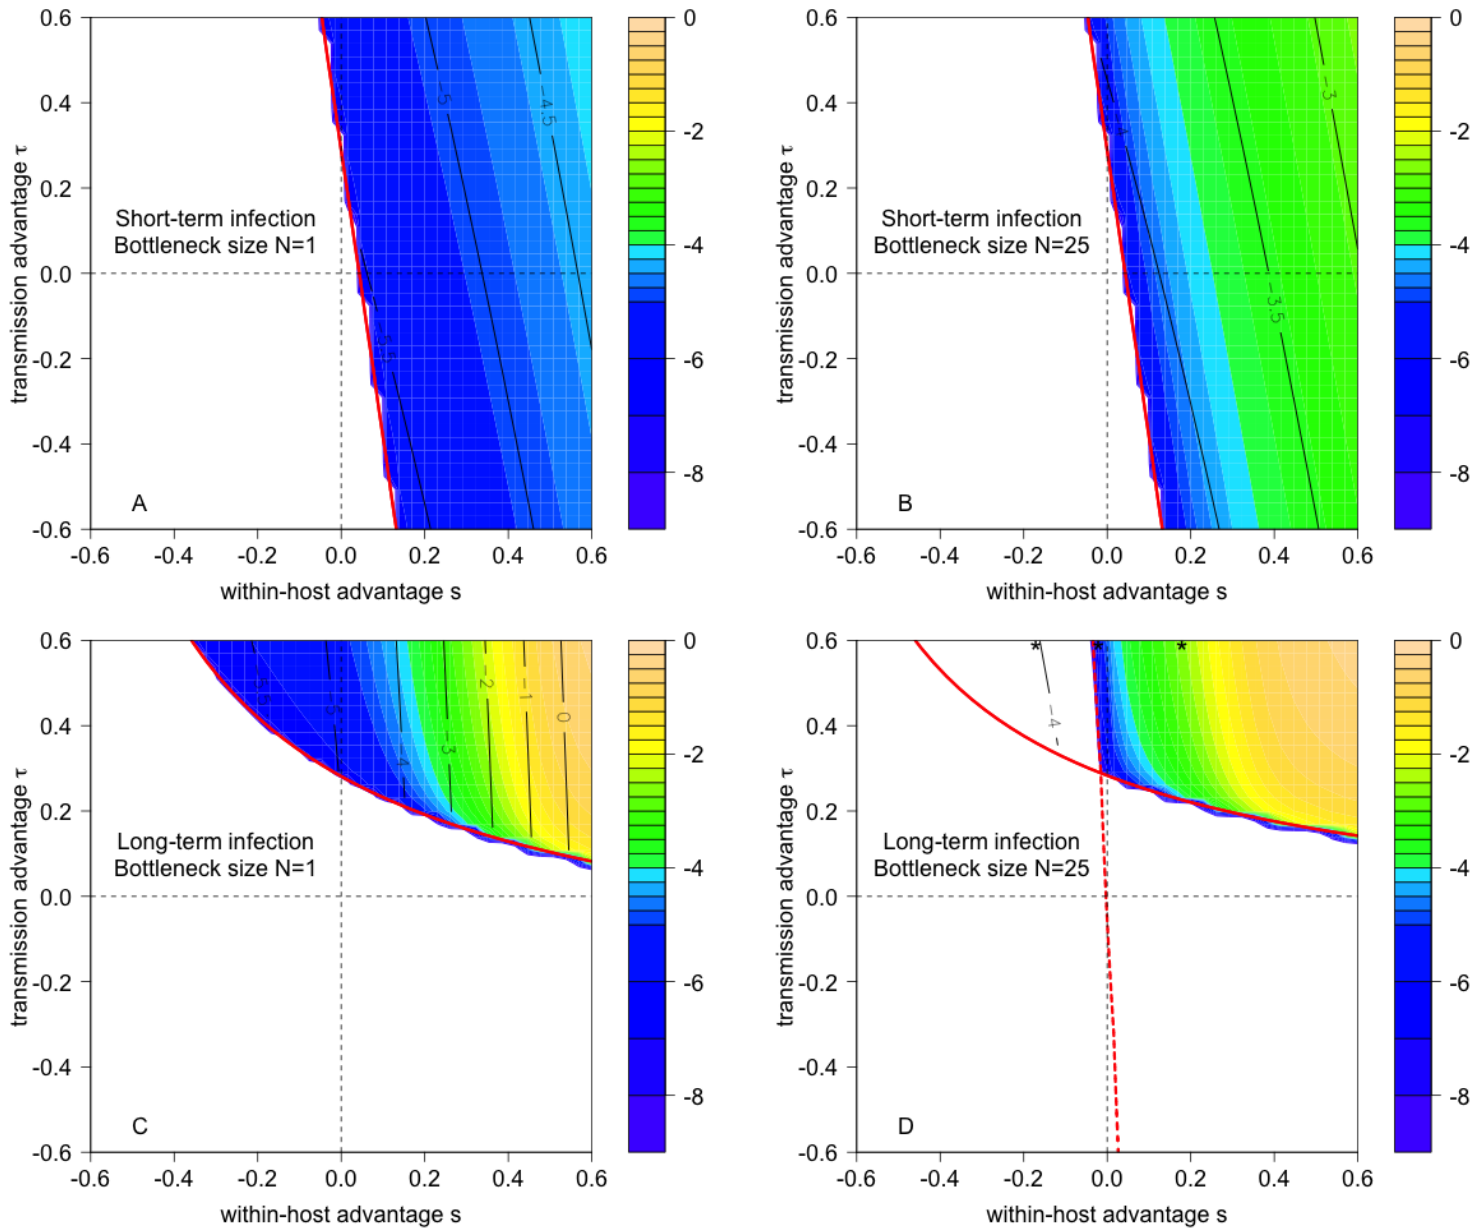

FIGURE APPENDIX-4. Emergence probabilities for the transmission function  $p(x) = \log(1+x)$  with all other parameters as indicated in Fig 2.

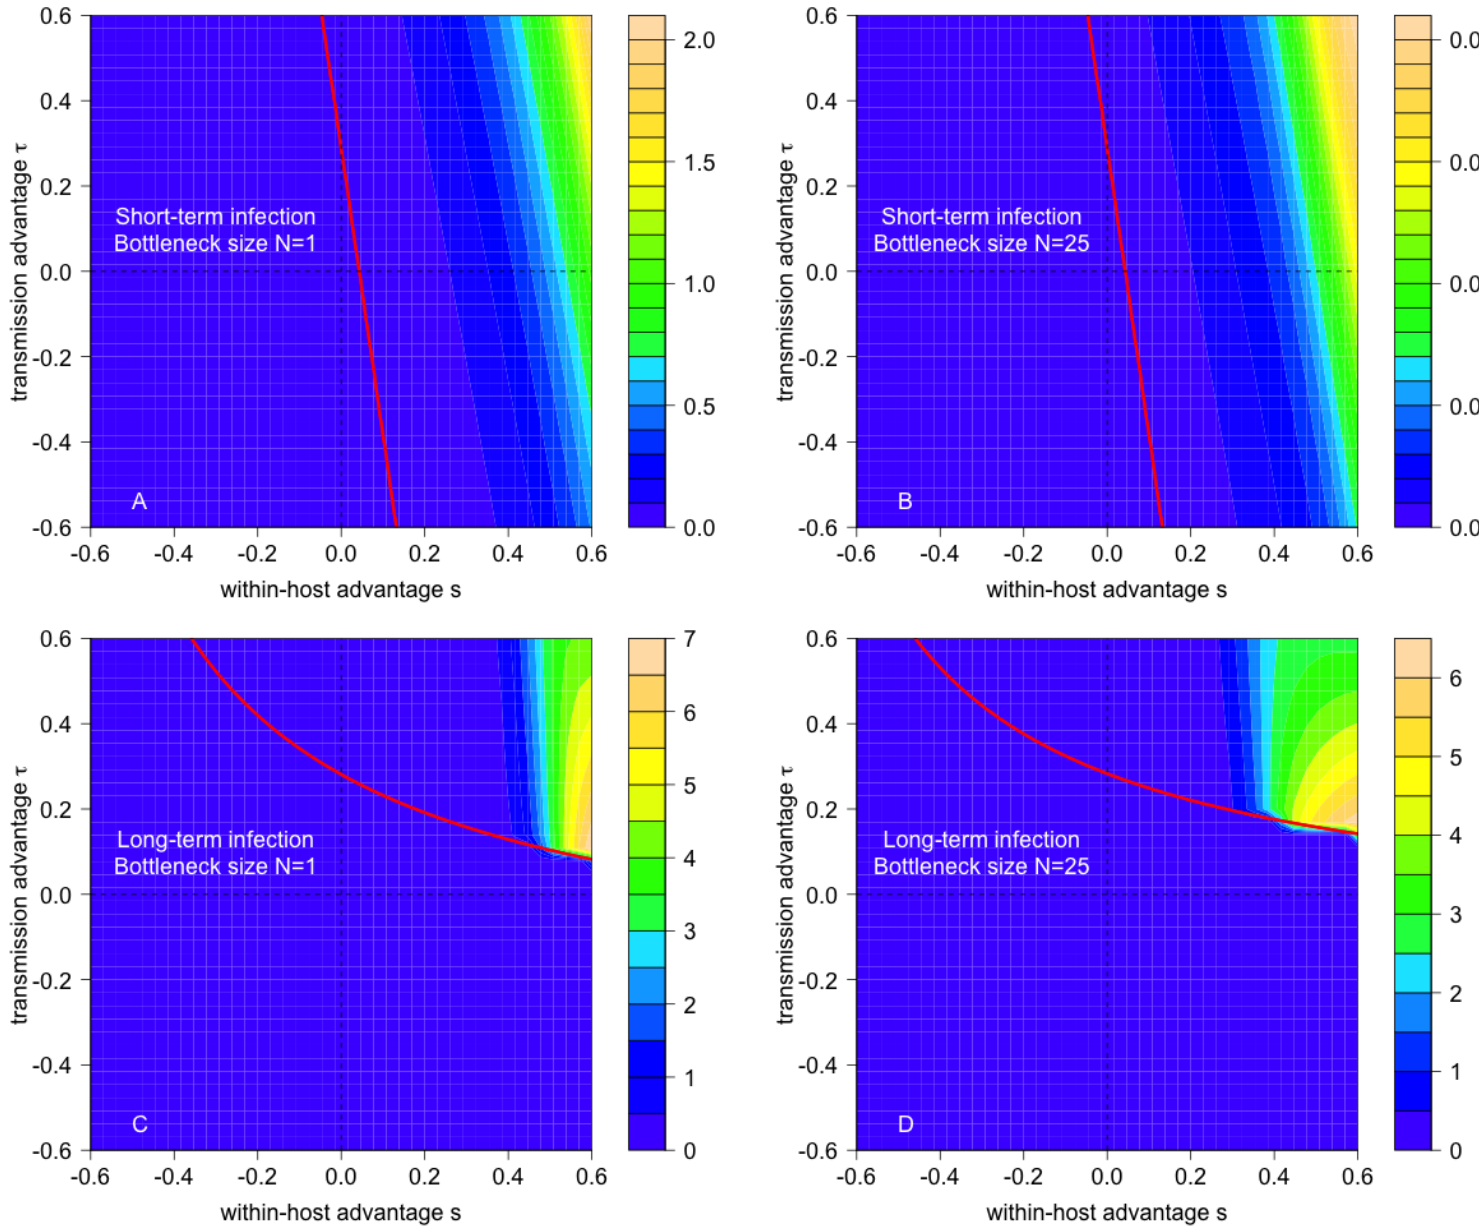

FIGURE APPENDIX-5. Contour plots of  $1,000 \times$  the absolute value of the difference between the emergence probabilities for the transmission functions  $p(x) = \log(1+x)$  and  $p(x) = x$ . Parameters as indicated in Fig 2.

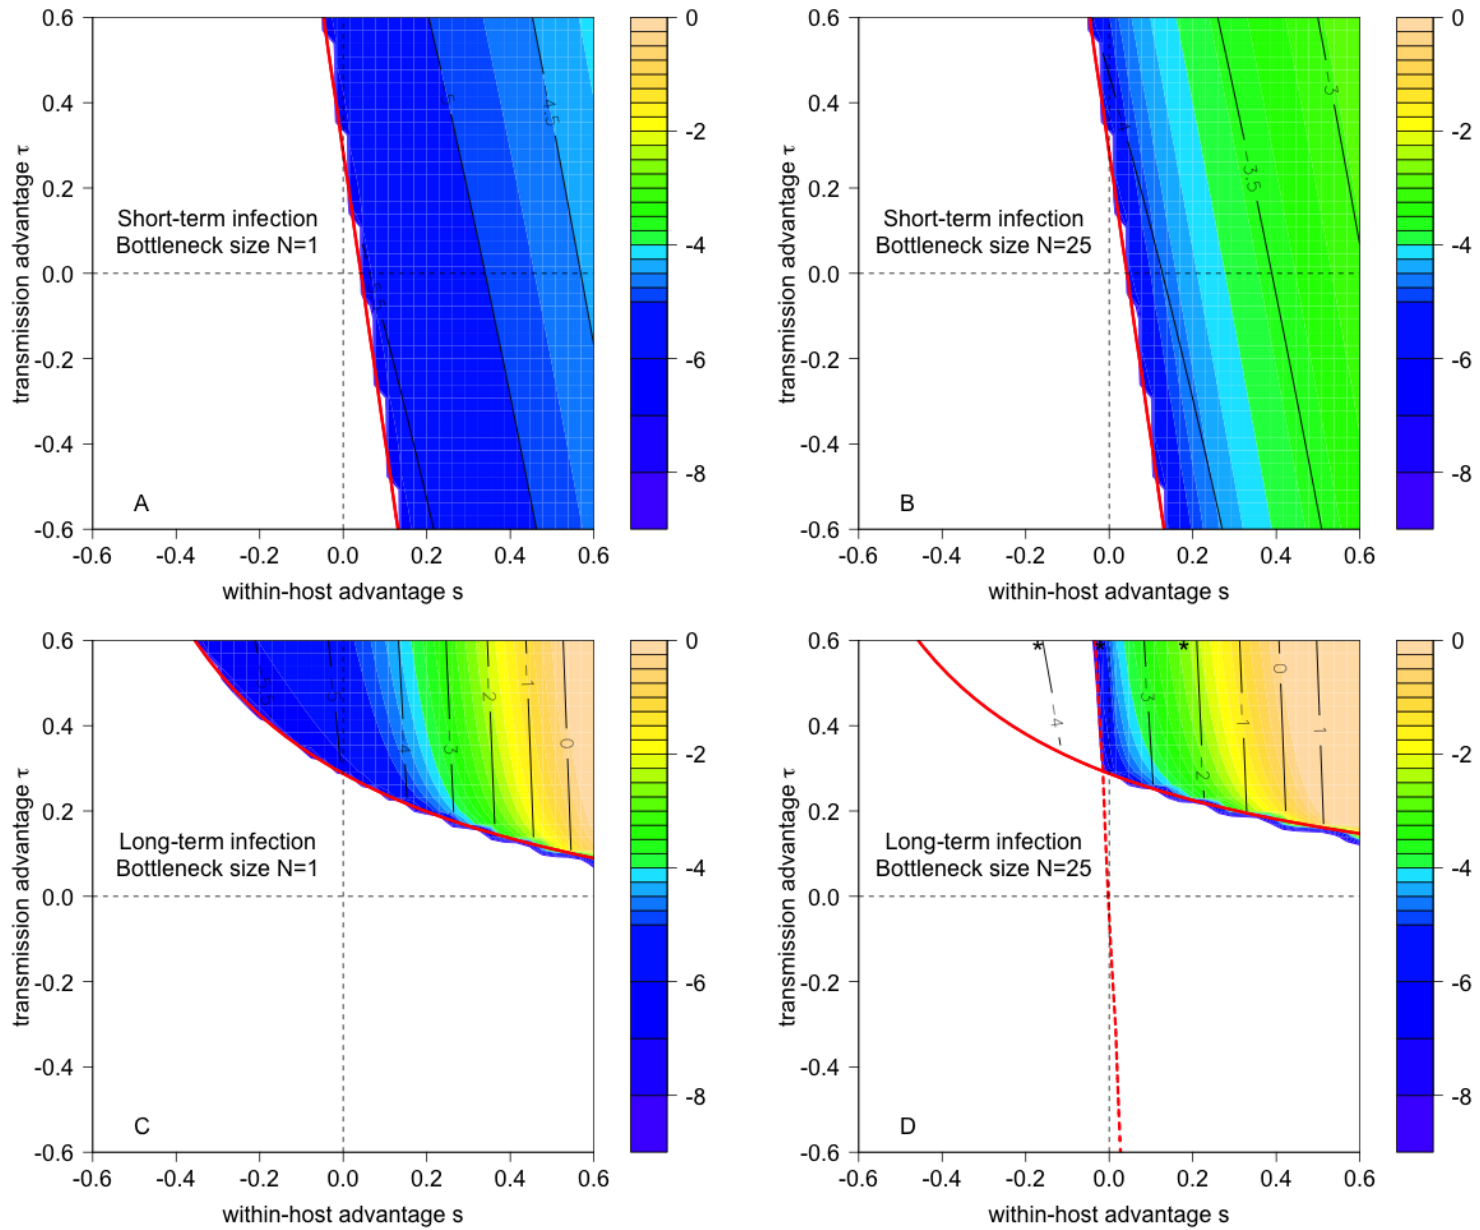

FIGURE APPENDIX-6. The analytic approximation based on (4) for the exact computations of the emergence probabilities in Fig 2 in the main text.



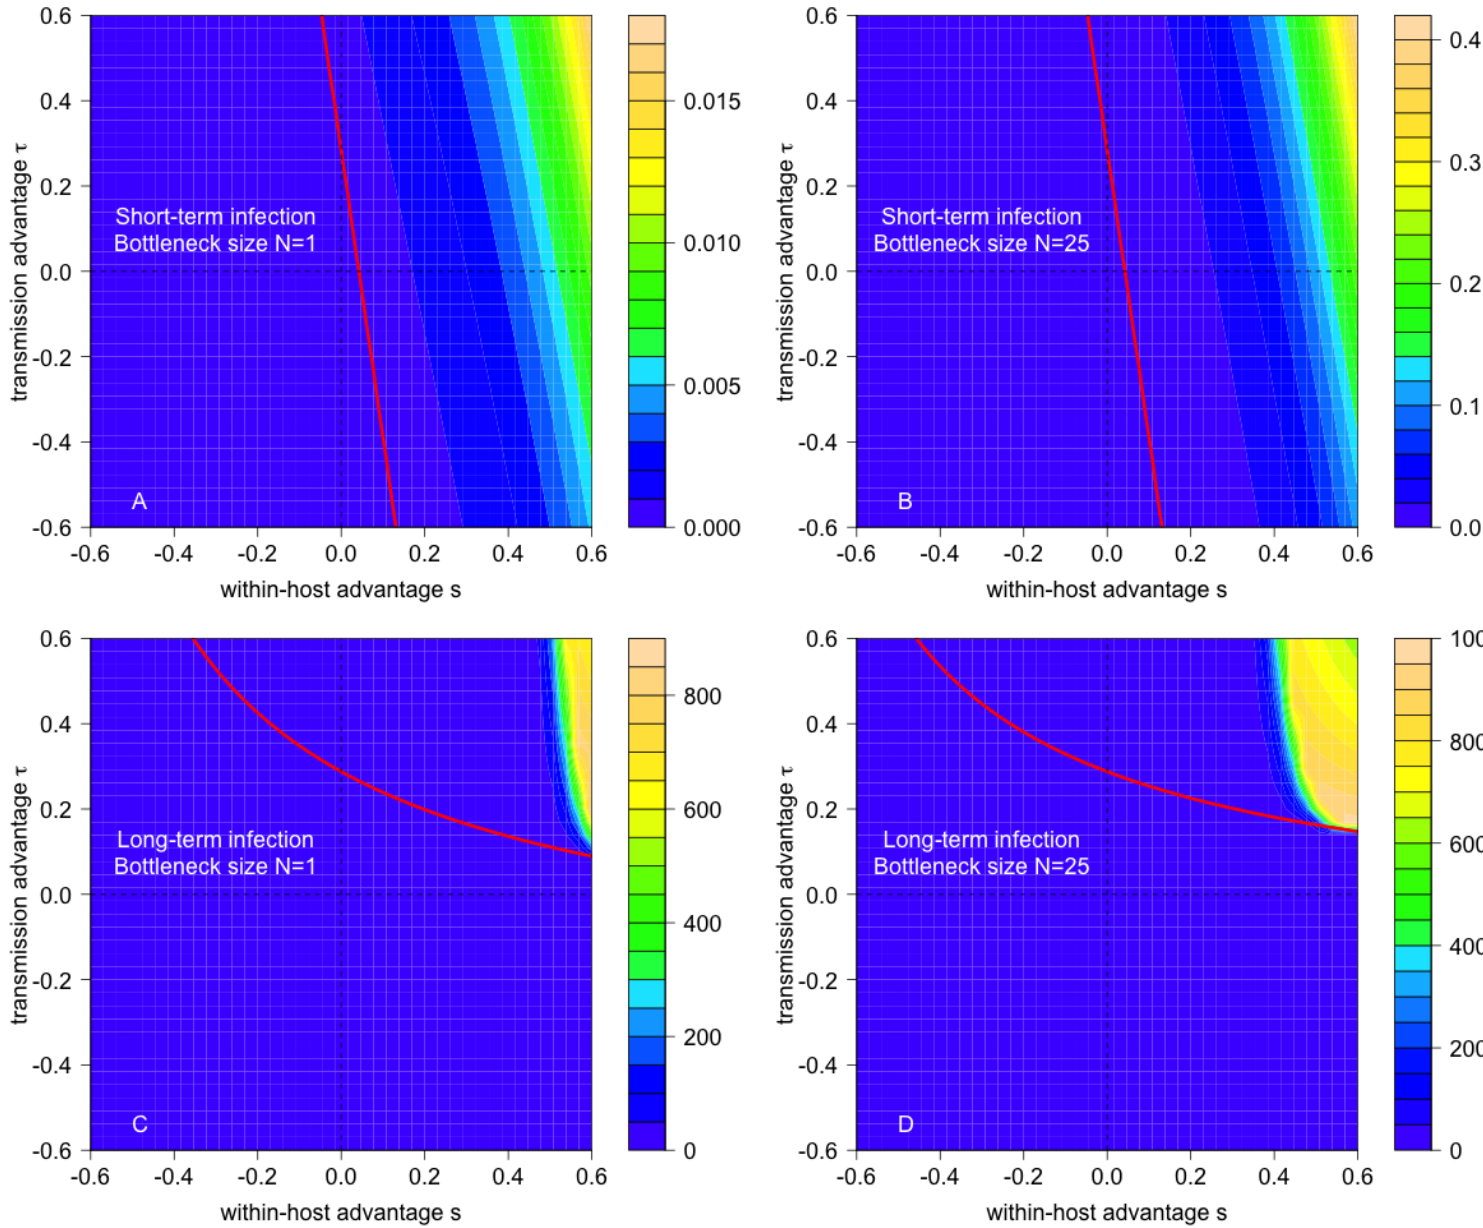

FIGURE APPENDIX-7. Contour plots of  $1,000 \times$  the absolute value in the difference between the analytic approximation from (4) and the exact computations for the emergence probabilities. Parameters as in Fig 2 in the main text.
